# Supplementary material for: MicroRNAs Regulate Ca2+ Homeostasis in Murine Embryonic Stem Cells
Source: Cells. 2023 Jul 28;12(15):1957. doi: 10.3390/cells12151957 (PMC10417630; doi:10.3390/cells12151957)
Supplement: Supplementary file 1 [file cells-12-01957-s001.zip › Table S1 Upregulated genes in arrays.xlsx]

## Sheet: Sheet1
Table S1. Up-regulated genes in Dicer-/- compared to Dicerfl/fl ESCs from gene expression arrays. Array data has been deposited in the GEO repository with the accession number
GSE93725
gene_assignment	Gene Symbol	RefSeq	p-value(DicerFx vs. DicerFx+TAM)	Fold-Change(DicerFx vs. DicerFx+TAM)
NM_018857 // Msln // mesothelin // 17 A3.3 // 56047 /// ENSMUST00000075884 // Msln // m	Msln	NM_018857	8.0704e-05	-3.47244
NM_020259 // Hhip // Hedgehog-interacting protein // 8 C3|8 40.0 cM // 15245 /// ENSMUS	Hhip	NM_020259	0.0064013	-3.46917
NM_009369 // Tgfbi // transforming growth factor, beta induced // 13 38.0 cM // 21810 /	Tgfbi	NM_009369	0.000909597	-2.81159
NM_001146299 // Sh3rf2 // SH3 domain containing ring finger 2 // 18 B3 // 269016 /// NM	Sh3rf2	NM_001146299	0.00965196	-2.48108
NM_029755 // Calcoco2 // calcium binding and coiled-coil domain 2 // 11 55.8 cM // 7681	Calcoco2	NM_029755	0.00436442	-2.47836
NM_001159518 // Igfbp7 // insulin-like growth factor binding protein 7 // 5 C3.3 // 298	Igfbp7	NM_001159518	0.000315574	-2.35265
NM_010094 // Lefty1 // left right determination factor 1 // 1 F // 13590 /// ENSMUST000	Lefty1	NM_010094	0.00332462	-2.34805
XR_034101 // Gm9697 // predicted gene 9697 // 16 B1|16 // 676915	Gm9697	XR_034101	0.00205646	-2.33773
NM_172790 // Ankrd52 // ankyrin repeat domain 52 // 10 D3 // 237615 /// ENSMUST00000014	Ankrd52	NM_172790	0.000100062	-2.31554
NM_009776 // Serping1 // serine (or cysteine) peptidase inhibitor, clade G, member 1 //	Serping1	NM_009776	0.000308325	-2.27252
NM_010156 // Samd9l // sterile alpha motif domain containing 9-like // 6 A1-A2 // 20908	Samd9l	NM_010156	0.0190001	-2.26696
NM_172294 // Sulf1 // sulfatase 1 // 1 A3 // 240725 /// ENSMUST00000088585 // Sulf1 //	Sulf1	NM_172294	0.00723573	-2.26499
NR_030403 // Mir302b // microRNA 302b // --- // 723948	Mir302b	NR_030403	0.0303226	-2.25303
NM_001033344 // Dusp27 // dual specificity phosphatase 27 (putative) // 1 H2.3 // 24089	Dusp27	NM_001033344	0.00831806	-2.24668
NM_009538 // Plagl1 // pleiomorphic adenoma gene-like 1 // 10 A2|10 15.0 cM // 22634 //	Plagl1	NM_009538	0.0100803	-2.24373
NM_009738 // Bche // butyrylcholinesterase // 3 E3 // 12038 /// ENSMUST00000029367 // B	Bche	NM_009738	0.034014	-2.21389
NM_011546 // Zeb1 // zinc finger E-box binding homeobox 1 // 18 A1|18 0.0 cM // 21417 /	Zeb1	NM_011546	0.0016942	-2.20827
NM_175263 // Notum // notum pectinacetylesterase homolog (Drosophila) // 11 E2 // 77583	Notum	NM_175263	0.00835261	-2.18534
NM_010827 // Msc // musculin // 1 A3|1 5.0 cM // 17681 /// ENSMUST00000027062 // Msc //	Msc	NM_010827	0.00221363	-2.15662
NM_021435 // Slc35b4 // solute carrier family 35, member B4 // 6 B1 // 58246 /// ENSMUS	Slc35b4	NM_021435	0.00351013	-2.13276
NM_011169 // Prlr // prolactin receptor // 15 A1|15 4.6 cM // 19116 /// BC096586 // Prl	Prlr	NM_011169	0.000524156	-2.12419
NM_153117 // 9530068E07Rik // RIKEN cDNA 9530068E07 gene // 11 B1.3 // 213673 /// BC034	9530068E07Rik	NM_153117	0.00061258	-2.11381
NM_009524 // Wnt5a // wingless-related MMTV integration site 5A // 14 A3|14 7.8 cM // 2	Wnt5a	NM_009524	0.0153432	-2.09652
NM_172799 // Ttll6 // tubulin tyrosine ligase-like family, member 6 // 11 D // 237930 /	Ttll6	NM_172799	0.0040671	-2.08707
NM_011348 // Sema3e // sema domain, immunoglobulin domain (Ig), short basic domain, sec	Sema3e	NM_011348	0.000854825	-2.07206
NM_028973 // Lrrc15 // leucine rich repeat containing 15 // 16 B2 // 74488 /// ENSMUST0	Lrrc15	NM_028973	0.00351988	-2.06302
NM_001029838 // Pknox2 // Pbx/knotted 1 homeobox 2 // 9 A4 // 208076 /// NM_148950 // P	Pknox2	NM_001029838	0.00261843	-2.02967
NM_153098 // Cd109 // CD109 antigen // 9 E1 // 235505 /// ENSMUST00000093812 // Cd109 /	Cd109	NM_153098	0.0202874	-2.02097
NM_032000 // Trps1 // trichorhinophalangeal syndrome I (human) // 15 C|15 30.1 cM // 83	Trps1	NM_032000	0.000715811	-2.01874
NM_028317 // 2810030E01Rik // RIKEN cDNA 2810030E01 gene // 2 A2 // 72668 /// ENSMUST00	2810030E01Rik	NM_028317	0.000145675	-2.01014
ENSMUST00000007601 // 2310003L06Rik // RIKEN cDNA 2310003L06 gene // 5 E1 // 74248	2310003L06Rik	ENSMUST00000007601	0.0206495	-2.00952
NM_007923 // Elk4 // ELK4, member of ETS oncogene family // 1 E3-G // 13714 /// ENSMUST	Elk4	NM_007923	4.58309e-05	-2.00021
NM_175271 // Lpar4 // lysophosphatidic acid receptor 4 // X D // 78134 /// ENSMUST00000	Lpar4	NM_175271	0.0275606	-1.99444
NM_029755 // Calcoco2 // calcium binding and coiled-coil domain 2 // 11 55.8 cM // 7681	Calcoco2	NM_029755	0.00641207	-1.98276
NM_153139 // Slc36a1 // solute carrier family 36 (proton/amino acid symporter), member	Slc36a1	NM_153139	0.000228682	-1.97664
NM_025807 // Slc16a9 // solute carrier family 16 (monocarboxylic acid transporters), me	Slc16a9	NM_025807	0.000174574	-1.96649
NM_177307 // Cyp4f39 // cytochrome P450, family 4, subfamily f, polypeptide 39 // 17 B1	Cyp4f39	NM_177307	0.000125018	-1.95655
NM_016753 // Lxn // latexin // 3 E1|3 31.6 cM // 17035 /// ENSMUST00000058981 // Lxn //	Lxn	NM_016753	0.000703709	-1.95429
NM_001029988 // Fat2 // FAT tumor suppressor homolog 2 (Drosophila) // 11 B1.3 // 24582	Fat2	NM_001029988	9.05472e-05	-1.94551
NM_178804 // Slit2 // slit homolog 2 (Drosophila) // 5 B3 // 20563 /// ENSMUST000000339	Slit2	NM_178804	0.0187369	-1.93646
NM_001110316 // Zscan4f // zinc finger and SCAN domain containing 4F // 7 A1 // 665902	Zscan4f	NM_001110316	8.01982e-05	-1.92563
NM_021426 // Nkain4 // Na+/K+ transporting ATPase interacting 4 // 2 H4 // 58237 /// NM	Nkain4	NM_021426	0.00519527	-1.92389
NR_030404 // Mir302c // microRNA 302c // --- // 723835	Mir302c	NR_030404	0.0500167	-1.91084
NM_153403 // Eif2c1 // eukaryotic translation initiation factor 2C, 1 // 4 D2.2 // 2365	Eif2c1	NM_153403	0.000491435	-1.90466
NM_016678 // Reck // reversion-inducing-cysteine-rich protein with kazal motifs // 4 B1	Reck	NM_016678	4.87492e-06	-1.902
NM_001039185 // Ceacam1 // carcinoembryonic antigen-related cell adhesion molecule 1 //	Ceacam1	NM_001039185	0.00810212	-1.90056
NM_009513 // Nrsn1 // neurensin 1 // 13 A3.1 // 22360 /// ENSMUST00000057866 // Nrsn1 /	Nrsn1	NM_009513	0.0106686	-1.88587
NM_010894 // Neurod1 // neurogenic differentiation 1 // 2 C3|2 46.0 cM // 18012 /// ENS	Neurod1	NM_010894	0.02109	-1.88221
NM_008078 // Gad2 // glutamic acid decarboxylase 2 // 2 A3|2 9.0 cM // 14417 /// ENSMUS	Gad2	NM_008078	0.00886497	-1.87833
NM_010164 // Eya1 // eyes absent 1 homolog (Drosophila) // 1 A3|1 10.4 cM // 14048 ///	Eya1	NM_010164	0.0142821	-1.87235
NM_016889 // Insm1 // insulinoma-associated 1 // 2 G1 // 53626 /// ENSMUST00000089257 /	Insm1	NM_016889	0.0168614	-1.86981
NM_175459 // Glis3 // GLIS family zinc finger 3 // 19 C1 // 226075 /// ENSMUST000000651	Glis3	NM_175459	3.3707e-06	-1.86378
NM_009814 // Casq2 // calsequestrin 2 // 3 F3 // 12373 /// ENSMUST00000029454 // Casq2	Casq2	NM_009814	0.0353778	-1.86065
NM_009138 // Ccl25 // chemokine (C-C motif) ligand 25 // 8 A1.1|8 1.0 cM // 20300 /// N	Ccl25	NM_009138	0.017058	-1.84966
NM_009468 // Dpysl3 // dihydropyrimidinase-like 3 // 18 B3 // 22240 /// NM_001136086 //	Dpysl3	NM_009468	1.94538e-05	-1.8496
NM_201371 // Prmt8 // protein arginine N-methyltransferase 8 // 6 F3 // 381813 /// ENSM	Prmt8	NM_201371	0.0362888	-1.84932
NM_016672 // Ddc // dopa decarboxylase // 11 A1-A4|11 7.0 cM // 13195 /// ENSMUST000001	Ddc	NM_016672	0.00646675	-1.84593
NM_001099331 // R3hdml // R3H domain containing-like // 2 H3 // 100043899 /// ENSMUST00	R3hdml	NM_001099331	0.0123382	-1.84184
NM_001170985 // Kirrel // kin of IRRE like (Drosophila) // 3 F1 // 170643 /// NM_130867	Kirrel	NM_001170985	0.000306409	-1.83526
NM_013690 // Tek // endothelial-specific receptor tyrosine kinase // 4 C5|4 43.6 cM //	Tek	NM_013690	0.013103	-1.83126
NM_172658 // Slco4c1 // solute carrier organic anion transporter family, member 4C1 //	Slco4c1	NM_172658	0.00191624	-1.82567
NM_010207 // Fgfr2 // fibroblast growth factor receptor 2 // 7 F3 // 14183 /// NM_20160	Fgfr2	NM_010207	0.00326748	-1.82443
NM_133859 // Olfml3 // olfactomedin-like 3 // 3 F2.2 // 99543 /// ENSMUST00000029440 //	Olfml3	NM_133859	0.00835509	-1.82316
NM_021394 // Zbp1 // Z-DNA binding protein 1 // 2 H3 // 58203 /// NM_001139519 // Zbp1	Zbp1	NM_021394	0.0208895	-1.80603
NM_198037 // Cachd1 // cache domain containing 1 // 4 C6 // 320508 /// BC058676 // Cach	Cachd1	NM_198037	0.016333	-1.80359
NM_178738 // Prss35 // protease, serine, 35 // 9 E3.1 // 244954 /// ENSMUST00000036426	Prss35	NM_178738	0.00018611	-1.79959
NM_145492 // Zfp521 // zinc finger protein 521 // 18 A1 // 225207 /// ENSMUST0000002528	Zfp521	NM_145492	0.00579894	-1.79875
NM_201375 // Kng2 // kininogen 2 // 16 B1 // 385643 /// NM_001102409 // Kng2 // kininog	Kng2	NM_201375	0.00250286	-1.79565
NM_001136072 // Meis2 // Meis homeobox 2 // 2 E4-E5|2 64.0 cM // 17536 /// NM_001159567	Meis2	NM_001136072	0.0140934	-1.78642
NM_010663 // Krt17 // keratin 17 // 11 D|11 58.7 cM // 16667 /// ENSMUST00000080893 //	Krt17	NM_010663	0.0122296	-1.78584
NM_001177775 // H60b // histocompatibility 60b // 10 A3 // 667281 /// NM_001177775 // H	H60b	NM_001177775	0.00346993	-1.78436
BC022741 // 2900011O08Rik // RIKEN cDNA 2900011O08 gene // 16 A1 // 67254 /// NM_144518	2900011O08Rik	BC022741	0.0340529	-1.78405
NM_019754 // Tagln3 // transgelin 3 // 16 B5 // 56370 /// ENSMUST00000096057 // Tagln3	Tagln3	NM_019754	0.00340928	-1.78088
NM_001013765 // Zscan4c // zinc finger and SCAN domain containing 4C // 7 A1 // 245109	Zscan4c	NM_001013765	0.000340735	-1.76976
NM_011584 // Nr1d2 // nuclear receptor subfamily 1, group D, member 2 // 14 A2 // 35318	Nr1d2	NM_011584	0.000787266	-1.76509
NM_133733 // 9030425E11Rik // RIKEN cDNA 9030425E11 gene // 9 A5.1 // 71566 /// ENSMUST	9030425E11Rik	NM_133733	0.0339704	-1.76325
NM_145148 // Frmd4b // FERM domain containing 4B // 6 D3 // 232288 /// ENSMUST000001133	Frmd4b	NM_145148	0.00284992	-1.76154
NM_028679 // Irak3 // interleukin-1 receptor-associated kinase 3 // 10 D2 // 73914 ///	Irak3	NM_028679	0.00372078	-1.75948
NM_138719 // Gnb5 // guanine nucleotide binding protein (G protein), beta 5 // 9 D|9 41	Gnb5	NM_138719	0.000303198	-1.75835
NM_153166 // Cpne5 // copine V // 17 A3.3 // 240058 /// ENSMUST00000024805 // Cpne5 //	Cpne5	NM_153166	0.01343	-1.74093
NM_011340 // Serpinf1 // serine (or cysteine) peptidase inhibitor, clade F, member 1 //	Serpinf1	NM_011340	0.0160739	-1.7393
NM_027491 // Rragd // Ras-related GTP binding D // 4 A5|4 11.4 cM // 52187 /// ENSMUST0	Rragd	NM_027491	0.0109032	-1.73083
NM_010128 // Emp1 // epithelial membrane protein 1 // 6 G1|6 65.0 cM // 13730 /// ENSMU	Emp1	NM_010128	0.013732	-1.72868
NM_016707 // Bcl11a // B-cell CLL/lymphoma 11A (zinc finger protein) // 11 A3.2 // 1402	Bcl11a	NM_016707	0.020648	-1.72271
NM_008494 // Lfng // LFNG O-fucosylpeptide 3-beta-N-acetylglucosaminyltransferase // 5	Lfng	NM_008494	0.00226167	-1.72252
NR_030405 // Mir302d // microRNA 302d // --- // 723928	Mir302d	NR_030405	0.0430976	-1.72196
NM_010496 // Id2 // inhibitor of DNA binding 2 // 12 B|12 7.0 cM // 15902 /// ENSMUST00	Id2	NM_010496	0.00285486	-1.71587
NM_001013765 // Zscan4c // zinc finger and SCAN domain containing 4C // 7 A1 // 245109	Zscan4c	NM_001013765	0.000491134	-1.71573
NM_015771 // Lats2 // large tumor suppressor 2 // 14 C3 // 50523 /// NM_153382 // Lats2	Lats2	NM_015771	0.0202543	-1.7155
NM_144731 // Galnt7 // UDP-N-acetyl-alpha-D-galactosamine: polypeptide N-acetylgalactos	Galnt7	NM_144731	6.62689e-05	-1.71301
BC137891 // 9030420J04Rik // RIKEN cDNA 9030420J04 gene // 9 A1 // 71544 /// ENSMUST000	9030420J04Rik	BC137891	0.0014796	-1.70715
XM_910971 // Gm4975 // predicted gene 4975 // 8 B3.1 // 244495	Gm4975	XM_910971	0.009305	-1.67747
NM_001115075 // H2-M5 // histocompatibility 2, M region locus 5 // 17 B1 // 240095 ///	H2-M5	NM_001115075	0.0153849	-1.67439
NM_011579 // Tgtp1 // T-cell specific GTPase 1 // 11 B1.2 // 21822 /// NM_001145164 //	Tgtp1	NM_011579	0.0216061	-1.67415
NM_013737 // Pla2g7 // phospholipase A2, group VII (platelet-activating factor acetylhy	Pla2g7	NM_013737	0.0114228	-1.67231
NM_028709 // Btbd11 // BTB (POZ) domain containing 11 // 10 C1 // 74007 /// NM_00101752	Btbd11	NM_028709	0.00436253	-1.67011
NM_009767 // Chic1 // cysteine-rich hydrophobic domain 1 // X D|X 42.3 cM // 12212 ///	Chic1	NM_009767	0.000608893	-1.6691
NM_009029 // Rb1 // retinoblastoma 1 // 14 D3|14 41.0 cM // 19645 /// ENSMUST0000002270	Rb1	NM_009029	0.00151795	-1.65884
NM_009767 // Chic1 // cysteine-rich hydrophobic domain 1 // X D|X 42.3 cM // 12212 ///	Chic1	NM_009767	0.000470093	-1.65651
NM_031402 // Crispld1 // cysteine-rich secretory protein LCCL domain containing 1 // --	Crispld1	NM_031402	0.000344148	-1.65454
NM_013456 // Actn3 // actinin alpha 3 // 19 A|19 3.0 cM // 11474 /// ENSMUST00000006626	Actn3	NM_013456	0.0081748	-1.65146
NM_183389 // Duxbl // double homeobox B-like // 14 A3 // 278672 /// NM_001177538 // Gm1	Duxbl	NM_183389	0.00161257	-1.65038
NM_183389 // Duxbl // double homeobox B-like // 14 A3 // 278672 /// NM_001177538 // Gm1	Duxbl	NM_183389	0.00161257	-1.65038
NM_008823 // Cfp // complement factor properdin // X A3|X 6.2 cM // 18636 /// ENSMUST00	Cfp	NM_008823	0.00183481	-1.64623
NM_011169 // Prlr // prolactin receptor // 15 A1|15 4.6 cM // 19116 /// BC005555 // Prl	Prlr	NM_011169	0.00324829	-1.64593
NM_181579 // Pof1b // premature ovarian failure 1B // X E1 // 69693 /// ENSMUST00000039	Pof1b	NM_181579	0.0120167	-1.63892
NM_029568 // Mfap4 // microfibrillar-associated protein 4 // 11 B2|11 34.35 cM // 76293	Mfap4	NM_029568	0.0021636	-1.63886
NM_183389 // Duxbl // double homeobox B-like // 14 A3 // 278672 /// NM_001177538 // Gm1	Duxbl	NM_183389	0.000838013	-1.63635
NM_001110337 // Gprc5c // G protein-coupled receptor, family C, group 5, member C // 11	Gprc5c	NM_001110337	0.00341993	-1.63516
NM_178396 // Car12 // carbonic anyhydrase 12 // 9 C // 76459 /// ENSMUST00000071889 //	Car12	NM_178396	0.0109605	-1.63416
NM_007715 // Clock // circadian locomoter output cycles kaput // 5 C3.3|5 43.0 cM // 12	Clock	NM_007715	8.28727e-05	-1.63219
NM_001033452 // Accsl // 1-aminocyclopropane-1-carboxylate synthase homolog (Arabidopsi	Accsl	NM_001033452	0.0416655	-1.62746
NM_148925 // Fyco1 // FYVE and coiled-coil domain containing 1 // 9 F|9 71.3 cM // 1728	Fyco1	NM_148925	0.000820055	-1.627
NM_011873 // Dazap2 // DAZ associated protein 2 // 15 F1|15 60.0 cM // 23994 /// ENSMUS	Dazap2	NM_011873	0.000211113	-1.62695
NM_172882 // Wdfy3 // WD repeat and FYVE domain containing 3 // 5 E4-E5|5 54.0 cM // 72	Wdfy3	NM_172882	0.0126172	-1.62676
NM_001134399 // Megf11 // multiple EGF-like-domains 11 // 9 C // 214058 /// NM_172522 /	Megf11	NM_001134399	0.0023075	-1.6218
NM_001081237 // Klhdc5 // kelch domain containing 5 // 6 G3 // 232539 /// ENSMUST000000	Klhdc5	NM_001081237	0.000112999	-1.62144
NM_021492 // Ap3b2 // adaptor-related protein complex 3, beta 2 subunit // 7 D3|7 38.0	Ap3b2	NM_021492	0.00153555	-1.62076
NM_008018 // Sh3pxd2a // SH3 and PX domains 2A // 19 D2 // 14218 /// NM_001164717 // Sh	Sh3pxd2a	NM_008018	0.00150889	-1.62032
NM_027049 // 1700008O03Rik // RIKEN cDNA 1700008O03 gene // 7 B2 // 69349 /// ENSMUST00	1700008O03Rik	NM_027049	0.00204521	-1.6184
NM_027884 // Tns1 // tensin 1 // 1 C3|1 44.5 cM // 21961	Tns1	NM_027884	0.00613649	-1.61772
NM_010434 // Hipk3 // homeodomain interacting protein kinase 3 // 2 E2 // 15259 /// NM_	Hipk3	NM_010434	1.61236e-06	-1.61765
NM_010945 // Nsmaf // neutral sphingomyelinase (N-SMase) activation associated factor /	Nsmaf	NM_010945	0.00119485	-1.61651
NM_020606 // Parva // parvin, alpha // 7 F1 // 57342 /// ENSMUST00000033030 // Parva //	Parva	NM_020606	0.0086226	-1.61645
NM_026682 // Cpsf4l // cleavage and polyadenylation specific factor 4-like // 11 E2|11	Cpsf4l	NM_026682	0.0281531	-1.61597
NM_001042438 // Zhx1 // zinc fingers and homeoboxes 1 // --- // 22770 /// NM_009572 //	Zhx1	NM_001042438	0.0214059	-1.60886
NM_178884 // Obsl1 // obscurin-like 1 // 1 C4 // 98733 /// ENSMUST00000113567 // Obsl1	Obsl1	NM_178884	0.00449117	-1.60676
NM_053099 // Setbp1 // SET binding protein 1 // 18 E3 // 240427 /// ENSMUST00000025430	Setbp1	NM_053099	0.0162556	-1.59965
BC116283 // 1700061G19Rik // RIKEN cDNA 1700061G19 gene // 17 D // 78625 /// ENSMUST000	1700061G19Rik	BC116283	0.00927795	-1.59893
NM_001018087 // Ldoc1 // leucine zipper, down-regulated in cancer 1 // X A6 // 434784 /	Ldoc1	NM_001018087	0.000318585	-1.59823
NM_008115 // Gfra2 // glial cell line derived neurotrophic factor family receptor alpha	Gfra2	NM_008115	0.0427774	-1.59803
NM_008604 // Mme // membrane metallo endopeptidase // 3 E1|3 29.6 cM // 17380 /// ENSMU	Mme	NM_008604	0.0157454	-1.59505
NM_019807 // Acpp // acid phosphatase, prostate // 9 F1 // 56318 /// NM_207668 // Acpp	Acpp	NM_019807	0.031823	-1.59378
NM_007547 // Sirpa // signal-regulatory protein alpha // 2 F3|2 73.1 cM // 19261 /// NM	Sirpa	NM_007547	0.0288112	-1.59052
NM_177753 // Sox21 // SRY-box containing gene 21 // 14 E4 // 223227 /// ENSMUST00000082	Sox21	NM_177753	0.00592515	-1.5896
NM_020510 // Fzd2 // frizzled homolog 2 (Drosophila) // 11 E1 // 57265 /// ENSMUST00000	Fzd2	NM_020510	0.021915	-1.5883
NR_003544 // Nnt // nicotinamide nucleotide transhydrogenase // 13 D2|13 64.0 cM // 181	Nnt	NR_003544	0.00186894	-1.58464
NM_019923 // Itpr2 // inositol 1,4,5-triphosphate receptor 2 // 6 G3|6 73.0 cM // 16439	Itpr2	NM_019923	0.0082193	-1.58243
NM_007825 // Cyp7b1 // cytochrome P450, family 7, subfamily b, polypeptide 1 // 3 A1|3	Cyp7b1	NM_007825	0.000998626	-1.57861
NM_177780 // Dock5 // dedicator of cytokinesis 5 // 14 D1 // 68813 /// ENSMUST000000391	Dock5	NM_177780	0.000332516	-1.57751
NM_153789 // Mylip // myosin regulatory light chain interacting protein // 13 A5 // 218	Mylip	NM_153789	0.0219103	-1.57493
NM_011891 // Sgcd // sarcoglycan, delta (dystrophin-associated glycoprotein) // 11 B1.2	Sgcd	NM_011891	0.000959624	-1.57325
NM_010110 // Efnb1 // ephrin B1 // X D|X 37.0 cM // 13641 /// ENSMUST00000052839 // Efn	Efnb1	NM_010110	0.00451501	-1.56981
NM_001037713 // Xaf1 // XIAP associated factor 1 // 11 B4 // 327959 /// ENSMUST00000094	Xaf1	NM_001037713	0.0282702	-1.56889
NM_178854 // Cnot6l // CCR4-NOT transcription complex, subunit 6-like // 5 E3 // 231464	Cnot6l	NM_178854	0.00299924	-1.56862
NM_001167949 // Atp2b4 // ATPase, Ca++ transporting, plasma membrane 4 // 1 E4 // 38129	Atp2b4	NM_001167949	0.00329775	-1.56706
NM_133739 // Tmem123 // transmembrane protein 123 // 9 A1 // 71929 /// ENSMUST000000528	Tmem123	NM_133739	0.000147376	-1.56314
BC096371 // D18Ertd653e // DNA segment, Chr 18, ERATO Doi 653, expressed // 18 E2|18 17	D18Ertd653e	BC096371	0.0106715	-1.56164
NM_011985 // Mmp23 // matrix metallopeptidase 23 // 4 E2 // 26561 /// ENSMUST0000003093	Mmp23	NM_011985	0.000393362	-1.56028
NM_008958 // Ptch2 // patched homolog 2 // 4 C-D|4 56.5 cM // 19207 /// ENSMUST00000030	Ptch2	NM_008958	0.0163738	-1.55924
NM_144925 // Tnrc6a // trinucleotide repeat containing 6a // 7 F3 // 233833 /// ENSMUST	Tnrc6a	NM_144925	6.19024e-05	-1.55859
NM_144853 // Cyyr1 // cysteine and tyrosine-rich protein 1 // 16 C3.3|16 56.2 cM // 224	Cyyr1	NM_144853	0.0364945	-1.55696
NM_145558 // Hadhb // hydroxyacyl-Coenzyme A dehydrogenase/3-ketoacyl-Coenzyme A thiola	Hadhb	NM_145558	0.00112603	-1.54955
NM_009189 // Six1 // sine oculis-related homeobox 1 homolog (Drosophila) // 12 C3|12 31	Six1	NM_009189	0.00300581	-1.54841
NM_001004366 // Scube3 // signal peptide, CUB domain, EGF-like 3 // 17 A3.3 // 268935 /	Scube3	NM_001004366	0.000714803	-1.54767
NM_001045531 // Spata22 // spermatogenesis associated 22 // 11 B4 // 380709 /// ENSMUST	Spata22	NM_001045531	0.0216091	-1.54764
NM_016710 // Hmgn5 // high-mobility group nucleosome binding domain 5 // X D // 50887 /	Hmgn5	NM_016710	0.0395372	-1.54749
NM_001085521 // Tmem90b // transmembrane protein 90B // 2 G3|2 // 433485 /// ENSMUST000	Tmem90b	NM_001085521	0.0146873	-1.54339
NM_001029878 // Lonrf2 // LON peptidase N-terminal domain and ring finger 2 // 1 B // 3	Lonrf2	NM_001029878	0.00753721	-1.54332
ENSMUST00000097468 // Gm10522 // predicted gene 10522 // --- // 100038407	Gm10522	ENSMUST00000097468	0.0263709	-1.54007
NM_175485 // Prtg // protogenin homolog (Gallus gallus) // 9 D // 235472 /// ENSMUST000	Prtg	NM_175485	0.0166566	-1.53978
NM_001167988 // Taf9b // TAF9B RNA polymerase II, TATA box binding protein (TBP)-associ	Taf9b	NM_001167988	0.0105199	-1.53963
NM_212484 // Cnot6 // CCR4-NOT transcription complex, subunit 6 // 11 B1.2 // 104625 //	Cnot6	NM_212484	0.000141431	-1.53845
NM_019971 // Pdgfc // platelet-derived growth factor, C polypeptide // 3 E3 // 54635 //	Pdgfc	NM_019971	0.000368826	-1.53771
NM_145558 // Hadhb // hydroxyacyl-Coenzyme A dehydrogenase/3-ketoacyl-Coenzyme A thiola	Hadhb	NM_145558	0.00164843	-1.53551
NM_018741 // Igfbpl1 // insulin-like growth factor binding protein-like 1 // 4 B2 // 75	Igfbpl1	NM_018741	0.0396671	-1.5344
NM_001110337 // Gprc5c // G protein-coupled receptor, family C, group 5, member C // 11	Gprc5c	NM_001110337	0.000714876	-1.53362
NM_172475 // Frmd4a // FERM domain containing 4A // 2 A1 // 209630 /// NM_001177843 //	Frmd4a	NM_172475	0.00328289	-1.53333
NM_008624 // Mras // muscle and microspikes RAS // 9 E3.3 // 17532 /// ENSMUST000000350	Mras	NM_008624	0.0147243	-1.53149
NM_001081349 // Slc43a1 // solute carrier family 43, member 1 // 2 E1 // 72401 /// NM_0	Slc43a1	NM_001081349	0.0131662	-1.53104
NM_053270 // Rims1 // regulating synaptic membrane exocytosis 1 // --- // 116837 /// NM	Rims1	NM_053270	0.0129156	-1.53076
NM_025295 // Btd // biotinidase // 14 B // 26363 /// ENSMUST00000090147 // Btd // bioti	Btd	NM_025295	0.000629416	-1.53
NM_027890 // Susd2 // sushi domain containing 2 // 10 B5.3 // 71733 /// NM_001162913 //	Susd2	NM_027890	0.00186871	-1.52999
NM_019861 // Ctsf // cathepsin F // 19 A // 56464 /// ENSMUST00000119694 // Ctsf // cat	Ctsf	NM_019861	0.000328191	-1.52783
NM_001081148 // Cyp2b23 // cytochrome P450, family 2, subfamily b, polypeptide 23 // 7	Cyp2b23	NM_001081148	0.0252711	-1.5276
BC137891 // 9030420J04Rik // RIKEN cDNA 9030420J04 gene // 9 A1 // 71544 /// BC137892 /	9030420J04Rik	BC137891	0.00278564	-1.52523
NM_001162884 // Igsf10 // immunoglobulin superfamily, member 10 // 3 D // 242050	Igsf10	NM_001162884	0.0319117	-1.52478
AK173199 // Rnf213 // ring finger protein 213 // 11 E2 // 672511	Rnf213	AK173199	0.015159	-1.52373
NM_028664 // Ankrd45 // ankyrin repeat domain 45 // 1 H1 // 73844 /// ENSMUST0000011160	Ankrd45	NM_028664	0.0143226	-1.5221
NM_009955 // Dpysl2 // dihydropyrimidinase-like 2 // 14 D1|14 28.2 cM // 12934 /// ENSM	Dpysl2	NM_009955	0.0354548	-1.52172
NM_001025382 // Fam196b // family with sequence similarity 196, member B // 11 A4|11 //	Fam196b	NM_001025382	0.0504003	-1.51814
NM_013454 // Abca1 // ATP-binding cassette, sub-family A (ABC1), member 1 // 4 A5-B3|4	Abca1	NM_013454	0.0170374	-1.51424
NM_021310 // Jmy // junction-mediating and regulatory protein // 13 C3 // 57748 /// ENS	Jmy	NM_021310	0.00587768	-1.514
NM_173747 // Gpkow // G patch domain and KOW motifs // X A1.1|X 1.6 cM // 209416 /// EN	Gpkow	NM_173747	0.000730062	-1.51312
ENSMUST00000099179 // AI452195 // expressed sequence AI452195 // --- // 105178	AI452195	ENSMUST00000099179	0.015591	-1.51265
NM_080288 // Elmo1 // engulfment and cell motility 1, ced-12 homolog (C. elegans) // 13	Elmo1	NM_080288	0.00126022	-1.51146
NM_023113 // Aspa // aspartoacylase // 11 B4 // 11484 /// ENSMUST00000021119 // Aspa //	Aspa	NM_023113	0.0149007	-1.51114
NR_028376 // A930004D18Rik // RIKEN cDNA A930004D18 gene // 2 A2 // 77940 /// NR_028377	A930004D18Rik	NR_028376	0.0297882	-1.51089
ENSMUST00000059507 // Purb // purine rich element binding protein B // 11 A1|11 3.0 cM	Purb	ENSMUST00000059507	0.00469092	-1.51075
NM_001024142 // Fbxo10 // F-box protein 10 // 4 B1 // 269529 /// ENSMUST00000052236 //	Fbxo10	NM_001024142	0.00881344	-1.51019
NM_011973 // Stk30 // serine/threonine kinase 30 // 12 F1 // 26448 /// ENSMUST000000217	Stk30	NM_011973	0.00573495	-1.51006
NM_053078 // D0H4S114 // DNA segment, human D4S114 // 18 B1 // 27528 /// NM_001109988 /	D0H4S114	NM_053078	0.00577875	-1.5093
NM_011579 // Tgtp1 // T-cell specific GTPase 1 // 11 B1.2 // 21822 /// NM_001145164 //	Tgtp1	NM_011579	0.0264276	-1.50908
NM_010600 // Kcnh1 // potassium voltage-gated channel, subfamily H (eag-related), membe	Kcnh1	NM_010600	0.00871606	-1.50838
NM_010470 // Hp1bp3 // heterochromatin protein 1, binding protein 3 // 4 D3 // 15441 //	Hp1bp3	NM_010470	0.00196027	-1.50797
NM_139232 // Fgd4 // FYVE, RhoGEF and PH domain containing 4 // 16 A3 // 224014 /// NM_	Fgd4	NM_139232	0.012822	-1.50776
NM_015729 // Acox1 // acyl-Coenzyme A oxidase 1, palmitoyl // 11 E2 // 11430 /// ENSMUS	Acox1	NM_015729	0.00937866	-1.50773
NM_001102411 // Kng1 // kininogen 1 // 16 B1 // 16644 /// NM_023125 // Kng1 // kininoge	Kng1	NM_001102411	0.000333342	-1.50672
NM_013494 // Cpe // carboxypeptidase E // 8 B3.1|8 32.6 cM // 12876 /// ENSMUST00000048	Cpe	NM_013494	0.0229073	-1.50296
NM_020043 // Igdcc4 // immunoglobulin superfamily, DCC subclass, member 4 // 9 C // 567	Igdcc4	NM_020043	0.043232	-1.50292
NM_172681 // D930015E06Rik // RIKEN cDNA D930015E06 gene // 3 F1 // 229473 /// BC062940	D930015E06Rik	NM_172681	0.00113244	-1.5029
NM_010633 // Uhmk1 // U2AF homology motif (UHM) kinase 1 // 1 H2 // 16589 /// ENSMUST00	Uhmk1	NM_010633	0.00639591	-1.50273
NM_009817 // Cast // calpastatin // 13 C1 // 12380 /// ENSMUST00000065629 // Cast // ca	Cast	NM_009817	9.0295e-05	-1.50195
NM_181860 // Mkl2 // MKL/myocardin-like 2 // 16 A1 // 239719 /// NM_001122667 // Mkl2 /	Mkl2	NM_181860	0.00178257	-1.50139
AK173199 // Rnf213 // ring finger protein 213 // 11 E2 // 672511	Rnf213	AK173199	0.0190622	-1.50122
NM_008861 // Pkd2 // polycystic kidney disease 2 // 5 E5|5 55.0 cM // 18764 /// ENSMUST	Pkd2	NM_008861	0.0497585	-1.49948
NM_153588 // Mkl2 // MKL/myocardin-like 2 // 16 A1 // 239719 /// NM_001122667 // Mkl2 /	Mkl2	NM_153588	0.00166758	-1.49768
NM_001162884 // Igsf10 // immunoglobulin superfamily, member 10 // 3 D // 242050 /// EN	Igsf10	NM_001162884	0.00128979	-1.49759
NM_001162884 // Igsf10 // immunoglobulin superfamily, member 10 // 3 D // 242050 /// EN	Igsf10	NM_001162884	0.00278181	-1.49721
NM_001109757 // Atp7a // ATPase, Cu++ transporting, alpha polypeptide // X D|X 44.0 cM	Atp7a	NM_001109757	0.00130689	-1.49586
NM_008452 // Klf2 // Kruppel-like factor 2 (lung) // 8 C1 // 16598 /// ENSMUST000000679	Klf2	NM_008452	0.00453629	-1.49361
NM_011857 // Odz3 // odd Oz/ten-m homolog 3 (Drosophila) // 8 B2 // 23965 /// NM_001145	Odz3	NM_011857	0.00110509	-1.48991
NM_009801 // Car2 // carbonic anhydrase 2 // 3 A1|3 10.5 cM // 12349 /// ENSMUST0000002	Car2	NM_009801	0.0282188	-1.48943
NM_001033277 // Spryd3 // SPRY domain containing 3 // 15 F3 // 223918 /// ENSMUST000001	Spryd3	NM_001033277	0.00184478	-1.48692
NM_153127 // Mmrn2 // multimerin 2 // 14 B // 105450 /// ENSMUST00000111908 // Mmrn2 //	Mmrn2	NM_153127	0.00902401	-1.48687
ENSMUST00000097739 // Pgap1 // post-GPI attachment to proteins 1 // 1 C1.1 // 241062	Pgap1	ENSMUST00000097739	0.0172439	-1.48656
NM_001171026 // Os9 // amplified in osteosarcoma // 10 D3 // 216440 /// NM_177614 // Os	Os9	NM_001171026	0.00240779	-1.48433
NM_032000 // Trps1 // trichorhinophalangeal syndrome I (human) // 15 C|15 30.1 cM // 83	Trps1	NM_032000	0.000268891	-1.48371
NM_008047 // Fstl1 // follistatin-like 1 // 16 B3|16 27.3 cM // 14314 /// ENSMUST000001	Fstl1	NM_008047	0.00142734	-1.48086
NM_001177833 // Smox // spermine oxidase // 2 F1 // 228608 /// NM_145533 // Smox // spe	Smox	NM_001177833	0.000570445	-1.48035
NM_007631 // Ccnd1 // cyclin D1 // 7 F5|7 72.3 cM // 12443 /// ENSMUST00000093962 // Cc	Ccnd1	NM_007631	0.0124937	-1.48004
NM_010512 // Igf1 // insulin-like growth factor 1 // 10 C1|10 48.0 cM // 16000 /// NM_0	Igf1	NM_010512	0.00131841	-1.47941
NM_175381 // 2700081O15Rik // RIKEN cDNA 2700081O15 gene // 19 A // 108899 /// ENSMUST0	2700081O15Rik	NM_175381	0.00165633	-1.47882
NM_027504 // Prdm16 // PR domain containing 16 // 4 E2 // 70673 /// NM_001177995 // Prd	Prdm16	NM_027504	0.0043532	-1.47842
NM_153588 // Mkl2 // MKL/myocardin-like 2 // 16 A1 // 239719 /// NM_001122667 // Mkl2 /	Mkl2	NM_153588	0.000127574	-1.47697
NM_175171 // Mast4 // microtubule associated serine/threonine kinase family member 4 //	Mast4	NM_175171	0.00219432	-1.47682
NM_153129 // Pacs1 // phosphofurin acidic cluster sorting protein 1 // 19 A // 107975 /	Pacs1	NM_153129	0.00369304	-1.47647
NM_001081388 // Rimbp2 // RIMS binding protein 2 // 5 G1.3 // 231760 /// ENSMUST0000011	Rimbp2	NM_001081388	0.00137648	-1.47644
NM_178255 // Hapln3 // hyaluronan and proteoglycan link protein 3 // 7 D3 // 67666 ///	Hapln3	NM_178255	0.0100073	-1.47641
NM_145227 // Oas2 // 2'-5' oligoadenylate synthetase 2 // 5 F|5 67.2 cM // 246728 /// E	Oas2	NM_145227	0.0220114	-1.47346
NM_001033196 // Znfx1 // zinc finger, NFX1-type containing 1 // 2 H3 // 98999 /// ENSMU	Znfx1	NM_001033196	0.00369909	-1.47226
NM_153094 // Klrb1f // killer cell lectin-like receptor subfamily B member 1F // 6 F3 /	Klrb1f	NM_153094	0.0196789	-1.47103
NM_001122594 // Phlpp2 // PH domain and leucine rich repeat protein phosphatase 2 // 8	Phlpp2	NM_001122594	0.00547258	-1.46982
NM_027897 // Rhpn2 // rhophilin, Rho GTPase binding protein 2 // 7 B1-B2|7 11.0 cM // 5	Rhpn2	NM_027897	0.00385392	-1.46981
NM_026162 // Plxdc2 // plexin domain containing 2 // 2 A2-A3 // 67448 /// ENSMUST000000	Plxdc2	NM_026162	0.0404605	-1.46873
NM_178656 // A530088H08Rik // RIKEN cDNA A530088H08 gene // 11 B3 // 193003 /// ENSMUST	A530088H08Rik	NM_178656	0.015451	-1.46751
NM_030711 // Erap1 // endoplasmic reticulum aminopeptidase 1 // 13 C1 // 80898 /// ENSM	Erap1	NM_030711	0.0189469	-1.46735
NM_183355 // Pbx1 // pre B-cell leukemia transcription factor 1 // 1 H2.3|1 88.1 cM //	Pbx1	NM_183355	0.00156485	-1.46639
NM_008437 // Napsa // napsin A aspartic peptidase // 7 B4 // 16541 /// ENSMUST000000022	Napsa	NM_008437	0.00379339	-1.4663
NM_172882 // Wdfy3 // WD repeat and FYVE domain containing 3 // 5 E4-E5|5 54.0 cM // 72	Wdfy3	NM_172882	0.00500526	-1.46542
NM_008108 // Gdf3 // growth differentiation factor 3 // 6 F1|6 60.6 cM // 14562 /// ENS	Gdf3	NM_008108	0.00320636	-1.46516
NM_001081445 // Ncam1 // neural cell adhesion molecule 1 // 9 A5.3|9 28.0 cM // 17967 /	Ncam1	NM_001081445	0.00340981	-1.46318
BC138468 // Ahnak2 // AHNAK nucleoprotein 2 // 12 F1 // 100041194 /// ENSMUST0000010101	Ahnak2	BC138468	0.0178031	-1.46302
NM_031408 // Gigyf1 // GRB10 interacting GYF protein 1 // 5 G2 // 57330 /// ENSMUST0000	Gigyf1	NM_031408	0.000271075	-1.4628
NM_010827 // Msc // musculin // 1 A3|1 5.0 cM // 17681 /// ENSMUST00000027062 // Msc //	Msc	NM_010827	0.00689445	-1.46183
NM_011056 // Pde4d // phosphodiesterase 4D, cAMP specific // 13 D2.1-D2.2 // 238871 ///	Pde4d	NM_011056	0.00345836	-1.46113
NM_172154 // Lcor // ligand dependent nuclear receptor corepressor // 19 C3 // 212391 /	Lcor	NM_172154	0.0121626	-1.4609
NM_178384 // Zfp74 // zinc finger protein 74 // 7 B1|7 9.0 cM // 72723 /// BC050048 //	Zfp74	NM_178384	0.00611429	-1.46016
NM_008034 // Folr1 // folate receptor 1 (adult) // 7 E3 // 14275 /// ENSMUST00000001882	Folr1	NM_008034	0.00498023	-1.45975
NM_001081173 // Lrch2 // leucine-rich repeats and calponin homology (CH) domain contain	Lrch2	NM_001081173	0.00135215	-1.45952
NM_001017959 // Lamp2 // lysosomal-associated membrane protein 2 // X A3.3|X 13.0 cM //	Lamp2	NM_001017959	0.00564054	-1.45889
NM_010828 // Cited2 // Cbp/p300-interacting transactivator, with Glu/Asp-rich carboxy-t	Cited2	NM_010828	0.0474706	-1.45724
NM_025311 // D14Ertd449e // DNA segment, Chr 14, ERATO Doi 449, expressed // --- // 660	D14Ertd449e	NM_025311	0.000924894	-1.45525
NM_178623 // Urgcp // upregulator of cell proliferation // 11 A1 // 72046 /// NM_001077	Urgcp	NM_178623	0.00154887	-1.45294
NM_027871 // Arhgef3 // Rho guanine nucleotide exchange factor (GEF) 3 // 14 A3|14 9.0	Arhgef3	NM_027871	0.0241841	-1.45016
NM_029525 // Prex2 // phosphatidylinositol-3,4,5-trisphosphate-dependent Rac exchange f	Prex2	NM_029525	0.0464353	-1.4488
AK145489 // Gm340 // predicted gene 340 // 19 C3 // 381224	Gm340	AK145489	0.0346829	-1.44802
NM_009370 // Tgfbr1 // transforming growth factor, beta receptor I // 4 B1|4 19.3 cM //	Tgfbr1	NM_009370	2.50996e-05	-1.44702
NM_183311 // Tmem145 // transmembrane protein 145 // 7 A3 // 330485 /// ENSMUST00000108	Tmem145	NM_183311	0.005629	-1.44637
NM_026796 // Smyd2 // SET and MYND domain containing 2 // 1 H6 // 226830 /// ENSMUST000	Smyd2	NM_026796	0.00172156	-1.44518
ENSMUST00000100823 // Gm10397 // predicted gene 10397 // --- // 100038401	Gm10397	ENSMUST00000100823	0.00293789	-1.44488
NM_009636 // Aebp1 // AE binding protein 1 // 11 A1 // 11568 /// ENSMUST00000102923 //	Aebp1	NM_009636	0.000214702	-1.4445
NM_001008550 // Zfyve26 // zinc finger, FYVE domain containing 26 // 12 C3 // 211978 //	Zfyve26	NM_001008550	0.0040027	-1.44423
NM_007688 // Cfl2 // cofilin 2, muscle // 12 C1 // 12632 /// ENSMUST00000078124 // Cfl2	Cfl2	NM_007688	0.00203909	-1.44307
NM_173419 // Dleu7 // deleted in lymphocytic leukemia, 7 // 14 D1 // 239133 /// ENSMUST	Dleu7	NM_173419	0.00376429	-1.44293
NM_021273 // Ckb // creatine kinase, brain // 12 F1|12 55.0 cM // 12709 /// ENSMUST0000	Ckb	NM_021273	0.0110217	-1.44248
NM_025311 // D14Ertd449e // DNA segment, Chr 14, ERATO Doi 449, expressed // --- // 660	D14Ertd449e	NM_025311	0.00103635	-1.44229
NM_178763 // Zfp750 // zinc finger protein 750 // 11 E2 // 319530 /// ENSMUST0000009229	Zfp750	NM_178763	0.00639349	-1.44131
NM_031166 // Id4 // inhibitor of DNA binding 4 // 13 B|13 31.0 cM // 15904 /// ENSMUST0	Id4	NM_031166	0.00372449	-1.44113
NM_020520 // Slc25a20 // solute carrier family 25 (mitochondrial carnitine/acylcarnitin	Slc25a20	NM_020520	0.00766341	-1.44025
NM_144830 // Tmem106a // transmembrane protein 106A // 11 D // 217203 /// ENSMUST000001	Tmem106a	NM_144830	0.00388238	-1.4399
NM_133197 // Mcf2 // mcf.2 transforming sequence // X 22.5 cM // 109904 /// ENSMUST0000	Mcf2	NM_133197	0.0114577	-1.43953
NM_175116 // Lpar6 // lysophosphatidic acid receptor 6 // 14 D3 // 67168 /// ENSMUST000	Lpar6	NM_175116	0.0434679	-1.43836
NM_033374 // Dock2 // dedicator of cyto-kinesis 2 // 11 A5 // 94176 /// ENSMUST00000093	Dock2	NM_033374	0.0140674	-1.4373
NM_025311 // D14Ertd449e // DNA segment, Chr 14, ERATO Doi 449, expressed // --- // 660	D14Ertd449e	NM_025311	0.00139642	-1.43724
NM_172478 // Tbc1d25 // TBC1 domain family, member 25 // X A1.1|X 2.1 cM // 209815 ///	Tbc1d25	NM_172478	0.0234305	-1.43628
NM_026301 // Rnf125 // ring finger protein 125 // 18 A2 // 67664 /// ENSMUST00000050004	Rnf125	NM_026301	0.000877987	-1.436
NM_001099637 // Cep170 // centrosomal protein 170 // 1 H4 // 545389 /// BC054781 // Cep	Cep170	NM_001099637	0.00104069	-1.43524
NM_025895 // Med28 // mediator of RNA polymerase II transcription, subunit 28 homolog (	Med28	NM_025895	0.000717671	-1.43307
NM_023277 // Jam3 // junction adhesion molecule 3 // 9 A4 // 83964 /// ENSMUST000000344	Jam3	NM_023277	0.00240497	-1.43242
NM_207282 // Dpp6 // dipeptidylpeptidase 6 // 5 B1|5 12.0 cM // 13483 /// NM_010075 //	Dpp6	NM_207282	0.00513516	-1.43181
NM_175537 // Zbtb38 // zinc finger and BTB domain containing 38 // 9 E3.3 // 245007 ///	Zbtb38	NM_175537	0.000144938	-1.43105
NM_010910 // Nefl // neurofilament, light polypeptide // 14 D3 // 18039 /// ENSMUST0000	Nefl	NM_010910	0.00403639	-1.43032
NM_008046 // Fst // follistatin // 13 D2.2 // 14313 /// ENSMUST00000022287 // Fst // fo	Fst	NM_008046	0.0171921	-1.43006
NM_133237 // Apcdd1 // adenomatosis polyposis coli down-regulated 1 // 18 E1 // 494504	Apcdd1	NM_133237	0.00119657	-1.42928
NM_015753 // Zeb2 // zinc finger E-box binding homeobox 2 // 2 C1 // 24136 /// ENSMUST0	Zeb2	NM_015753	0.00828598	-1.42903
NM_027425 // Rufy2 // RUN and FYVE domain-containing 2 // 10 B4|10 32.0 cM // 70432 ///	Rufy2	NM_027425	0.000676747	-1.42885
NM_001013385 // Grm4 // glutamate receptor, metabotropic 4 // 17 A3.3 // 268934 /// ENS	Grm4	NM_001013385	0.000446033	-1.42739
NM_178908 // Fam26e // family with sequence similarity 26, member E // 10 B1 // 103511	Fam26e	NM_178908	0.0459988	-1.42683
NM_172465 // Zdhhc9 // zinc finger, DHHC domain containing 9 // X A4 // 208884 /// ENSM	Zdhhc9	NM_172465	0.000972017	-1.42603
NM_144882 // Spats2l // spermatogenesis associated, serine-rich 2-like // 1 C2 // 67198	Spats2l	NM_144882	0.0219438	-1.42527
NM_144812 // Tnrc6b // trinucleotide repeat containing 6b // 15 E1 // 213988 /// NM_177	Tnrc6b	NM_144812	0.00043403	-1.42497
NM_001081064 // Pdzd2 // PDZ domain containing 2 // 15 A2 // 68070 /// ENSMUST000000753	Pdzd2	NM_001081064	0.02361	-1.42497
NM_207636 // Fndc3a // fibronectin type III domain containing 3A // 14 D2 // 319448 ///	Fndc3a	NM_207636	0.00035993	-1.42479
NM_001081216 // Phip // pleckstrin homology domain interacting protein // 9 E3.1 // 839	Phip	NM_001081216	0.00190471	-1.42225
NM_199016 // Enpp4 // ectonucleotide pyrophosphatase/phosphodiesterase 4 // 17 B3 // 22	Enpp4	NM_199016	0.00668089	-1.42196
NM_008262 // Onecut1 // one cut domain, family member 1 // 9 D|9 42.0 cM // 15379 /// E	Onecut1	NM_008262	0.00641395	-1.42188
NM_009390 // Tll1 // tolloid-like // 8 B3.1|8 32.4 cM // 21892 /// ENSMUST00000066166 /	Tll1	NM_009390	0.00419318	-1.42112
NM_001146351 // Ephb6 // Eph receptor B6 // 6 B2.1 // 13848 /// NM_007680 // Ephb6 // E	Ephb6	NM_001146351	0.0116676	-1.42093
NM_001160369 // A830018L16Rik // RIKEN cDNA A830018L16 gene // 1 A2 // 320492 /// NM_17	A830018L16Rik	NM_001160369	0.0370664	-1.42073
NM_133888 // Smpdl3b // sphingomyelin phosphodiesterase, acid-like 3B // 4 D2.3 // 1003	Smpdl3b	NM_133888	0.0453351	-1.42019
NM_026880 // Pink1 // PTEN induced putative kinase 1 // 4 D3 // 68943 /// ENSMUST000000	Pink1	NM_026880	0.00122386	-1.41975
NM_173390 // Nhsl1 // NHS-like 1 // 10 A3|10 8.0 cM // 215819 /// NM_001163592 // Nhsl1	Nhsl1	NM_173390	0.00058791	-1.41838
NM_130878 // Cdhr1 // cadherin-related family member 1 // 14 B // 170677 /// ENSMUST000	Cdhr1	NM_130878	0.0350525	-1.41742
NM_001081249 // Vcan // versican // 13 C3|13 55.0 cM // 13003 /// NM_019389 // Vcan //	Vcan	NM_001081249	0.046774	-1.41584
NM_020005 // Kat2b // K(lysine) acetyltransferase 2B // 17 C|17 30.0 cM // 18519 /// EN	Kat2b	NM_020005	0.00830926	-1.41538
NM_019550 // Ptbp2 // polypyrimidine tract binding protein 2 // 3 G1 // 56195 /// ENSMU	Ptbp2	NM_019550	0.0247937	-1.41523
NM_007610 // Casp2 // caspase 2 // 6 B2.1|6 20.5 cM // 12366 /// ENSMUST00000031895 //	Casp2	NM_007610	0.00651944	-1.41421
ENSMUST00000099454 // AI606181 // expressed sequence AI606181 // 19 C3 // 226118 /// BC	AI606181	ENSMUST00000099454	0.030663	-1.413
NM_172570 // Trim47 // tripartite motif-containing 47 // 11 E2 // 217333 /// ENSMUST000	Trim47	NM_172570	0.00546283	-1.41126
NM_001146007 // 9230105E10Rik // RIKEN cDNA 9230105E10 gene // 7 E3 // 319236 /// ENSMU	9230105E10Rik	NM_001146007	0.0049082	-1.4108
NM_172729 // Nod1 // nucleotide-binding oligomerization domain containing 1 // 6 B3 //	Nod1	NM_172729	0.00585163	-1.40865
NM_001042591 // Arrdc3 // arrestin domain containing 3 // 13 C3 // 105171 /// ENSMUST00	Arrdc3	NM_001042591	0.00171037	-1.40749
NM_015786 // Hist1h1c // histone cluster 1, H1c // 13 A2-A3 // 50708 /// ENSMUST0000004	Hist1h1c	NM_015786	0.000321895	-1.40689
NR_029530 // Mir23b // microRNA 23b // --- // 387217	Mir23b	NR_029530	0.0202131	-1.40681
NM_019410 // Pfn2 // profilin 2 // 3 D|3 29.3 cM // 18645 /// ENSMUST00000066882 // Pfn	Pfn2	NM_019410	0.00343227	-1.40666
NM_001033373 // Cdk15 // cyclin-dependent kinase 15 // 1 C1.3 // 271697 /// BC147314 //	Cdk15	NM_001033373	0.0279794	-1.40645
NM_007456 // Ap1m1 // adaptor-related protein complex AP-1, mu subunit 1 // 8 B3.3|8 33	Ap1m1	NM_007456	0.0188538	-1.40564
NM_026984 // Mll5 // myeloid/lymphoid or mixed-lineage leukemia 5 // 5 A3 // 69188 ///	Mll5	NM_026984	0.00208555	-1.40528
NM_001042743 // Mast2 // microtubule associated serine/threonine kinase 2 // 4 C7 // 17	Mast2	NM_001042743	0.00166555	-1.40518
NM_001100591 // Rc3h2 // ring finger and CCCH-type zinc finger domains 2 // 2 B // 3198	Rc3h2	NM_001100591	0.0155116	-1.40465
NM_177863 // Frem1 // Fras1 related extracellular matrix protein 1 // 4 C3 // 329872 //	Frem1	NM_177863	0.00211926	-1.40434
NM_001081212 // Irs2 // insulin receptor substrate 2 // 8 A1.1 // 384783 /// ENSMUST000	Irs2	NM_001081212	0.0319972	-1.4035
ENSMUST00000064487 // Gm9884 // predicted gene 9884 // --- // 791399 /// ENSMUST0000006	Gm9884	ENSMUST00000064487	0.0408442	-1.40308
NM_028759 // Dcaf6 // DDB1 and CUL4 associated factor 6 // 1 H2 // 74106 /// ENSMUST000	Dcaf6	NM_028759	0.00170696	-1.40249
NM_007915 // Ei24 // etoposide induced 2.4 mRNA // 9 A4|9 14.0 cM // 13663 /// ENSMUST0	Ei24	NM_007915	0.000879781	-1.40241
NM_010441 // Hmga2 // high mobility group AT-hook 2 // 10 D2|10 67.5 cM // 15364 /// EN	Hmga2	NM_010441	0.026135	-1.40201
NM_183171 // Fez1 // fasciculation and elongation protein zeta 1 (zygin I) // 9 A4 // 2	Fez1	NM_183171	0.0183646	-1.40138
NM_001163572 // Tmem170b // transmembrane protein 170B // 13 A4 // 621976	Tmem170b	NM_001163572	0.00107123	-1.40108
NM_133990 // Il13ra1 // interleukin 13 receptor, alpha 1 // X A3.3|X 12.5 cM // 16164 /	Il13ra1	NM_133990	0.00545066	-1.39983
NM_138315 // Mical1 // microtubule associated monoxygenase, calponin and LIM domain con	Mical1	NM_138315	0.00191238	-1.39955
NM_013602 // Mt1 // metallothionein 1 // 8 C5|8 45.0 cM // 17748 /// ENSMUST00000034215	Mt1	NM_013602	0.0352669	-1.39842
NM_001134461 // Prickle2 // prickle homolog 2 (Drosophila) // 6 D1 // 243548 /// NM_001	Prickle2	NM_001134461	0.00779646	-1.39792
NM_001001182 // Baz2b // bromodomain adjacent to zinc finger domain, 2B // 2 C1.1 // 40	Baz2b	NM_001001182	0.00430024	-1.39737
NM_001013811 // Fam169b // family with sequence similarity 169, member B // 7 D1|7 // 4	Fam169b	NM_001013811	0.0209817	-1.39566
NM_010848 // Myb // myeloblastosis oncogene // 10 A3|10 16.0 cM // 17863 /// ENSMUST000	Myb	NM_010848	0.0114017	-1.39564
NM_172887 // Fry // furry homolog (Drosophila) // 5 G3 // 320365 /// ENSMUST00000087204	Fry	NM_172887	0.0326076	-1.39525
NM_001177536 // Prdm11 // PR domain containing 11 // 2 E1 // 100042784 /// ENSMUST00000	Prdm11	NM_001177536	0.0107035	-1.39443
NM_053109 // Clec2d // C-type lectin domain family 2, member d // 6 F3 // 93694 /// ENS	Clec2d	NM_053109	0.0193243	-1.39322
NM_145356 // Zbtb7c // zinc finger and BTB domain containing 7C // 18 E3 // 207259 ///	Zbtb7c	NM_145356	0.00358211	-1.39293
NM_016803 // Chst3 // carbohydrate (chondroitin 6/keratan) sulfotransferase 3 // 10 B4	Chst3	NM_016803	0.00677997	-1.39251
NM_145398 // Casd1 // CAS1 domain containing 1 // 6 A1|6 0.5 cM // 213819 /// ENSMUST00	Casd1	NM_145398	0.00358905	-1.39245
NM_194335 // Naif1 // nuclear apoptosis inducing factor 1 // 2 B // 71254 /// ENSMUST00	Naif1	NM_194335	0.00241896	-1.39191
NM_175291 // Dock10 // dedicator of cytokinesis 10 // 1 C4 // 210293 /// ENSMUST0000007	Dock10	NM_175291	0.000104502	-1.39161
NM_212445 // Kdelc2 // KDEL (Lys-Asp-Glu-Leu) containing 2 // 9 A5.3 // 68304 /// ENSMU	Kdelc2	NM_212445	0.00878855	-1.39104
NM_010497 // Idh1 // isocitrate dehydrogenase 1 (NADP+), soluble // 1 C2|1 29.8 cM // 1	Idh1	NM_010497	0.0179063	-1.39055
NM_028013 // Endod1 // endonuclease domain containing 1 // 9 A3 // 71946 /// ENSMUST000	Endod1	NM_028013	0.0320292	-1.39036
NM_177303 // Lrrn4 // leucine rich repeat neuronal 4 // 2 F2 // 320974 /// ENSMUST00000	Lrrn4	NM_177303	0.000575777	-1.3901
NM_173427 // Klhdc7a // kelch domain containing 7A // 4 D3 // 242721 /// ENSMUST0000010	Klhdc7a	NM_173427	0.0397359	-1.3877
NM_001168304 // Cdk19 // cyclin-dependent kinase 19 // 10 B1 // 78334 /// NM_198164 //	Cdk19	NM_001168304	0.000491695	-1.38767
NM_029726 // Trdn // triadin // 10 A4 // 76757	Trdn	NM_029726	0.00204017	-1.38617
NM_026302 // Dctn4 // dynactin 4 // 18 D2 // 67665 /// ENSMUST00000025505 // Dctn4 // d	Dctn4	NM_026302	0.00169288	-1.38469
NM_146934 // Olfr46 // olfactory receptor 46 // 7 F5 // 18345 /// NM_001011867 // Olfr5	Olfr46	NM_146934	0.00635654	-1.38455
NM_025762 // 4933434E20Rik // RIKEN cDNA 4933434E20 gene // 3 F1 // 99650	4933434E20Rik	NM_025762	0.0181403	-1.38442
NM_177364 // Sh3pxd2b // SH3 and PX domains 2B // 11 A4 // 268396 /// ENSMUST0000003875	Sh3pxd2b	NM_177364	0.00332031	-1.383
NR_024078 // Btbd19 // BTB (POZ) domain containing 19 // 4 D1 // 78611 /// ENSMUST00000	Btbd19	NR_024078	0.0342578	-1.3817
NM_007501 // Neurod4 // neurogenic differentiation 4 // 10 D3|10 72.0 cM // 11923 /// E	Neurod4	NM_007501	0.0186066	-1.38095
NM_001033332 // Tmtc3 // transmembrane and tetratricopeptide repeat containing 3 // 10	Tmtc3	NM_001033332	0.00969433	-1.3808
NM_173182 // Fndc3b // fibronectin type III domain containing 3B // 3 A3 // 72007 /// E	Fndc3b	NM_173182	0.0210298	-1.38048
NM_011995 // Pclo // piccolo (presynaptic cytomatrix protein) // --- // 26875 /// NM_00	Pclo	NM_011995	0.00296554	-1.38044
NM_011905 // Tlr2 // toll-like receptor 2 // 3 E3 // 24088 /// ENSMUST00000029623 // Tl	Tlr2	NM_011905	0.0083028	-1.38029
NM_010589 // Jak3 // Janus kinase 3 // 8 B3.3|8 33.0 cM // 16453 /// NM_013564 // Insl3	Jak3	NM_010589	0.0163464	-1.38006
NM_025932 // Syap1 // synapse associated protein 1 // X F4 // 67043 /// ENSMUST00000033	Syap1	NM_025932	7.96476e-05	-1.37952
NM_025762 // 4933434E20Rik // RIKEN cDNA 4933434E20 gene // 3 F1 // 99650 /// AY533135	4933434E20Rik	NM_025762	0.0287801	-1.379
NM_007434 // Akt2 // thymoma viral proto-oncogene 2 // 7 B1|7 6.5 cM // 11652 /// NM_00	Akt2	NM_007434	0.000897972	-1.37893
NM_008917 // Ppt1 // palmitoyl-protein thioesterase 1 // 4 D1-D3|4 59.1 cM // 19063 ///	Ppt1	NM_008917	0.0017948	-1.37866
NM_001038609 // Mapt // microtubule-associated protein tau // 11 E1|11 64.0 cM // 17762	Mapt	NM_001038609	0.0161368	-1.37825
NM_023061 // Mcam // melanoma cell adhesion molecule // 9 A5.1 // 84004 /// ENSMUST0000	Mcam	NM_023061	0.0487897	-1.37746
NM_019986 // Habp4 // hyaluronic acid binding protein 4 // 13 B3|13 36.0 cM // 56541 //	Habp4	NM_019986	0.0401929	-1.3767
NM_021272 // Fabp7 // fatty acid binding protein 7, brain // 10 B4 // 12140 /// ENSMUST	Fabp7	NM_021272	0.0453565	-1.37664
NM_183187 // Fam107a // family with sequence similarity 107, member A // 14 A1 // 26870	Fam107a	NM_183187	0.00367692	-1.37564
NM_009579 // Slc30a1 // solute carrier family 30 (zinc transporter), member 1 // 1 H6|1	Slc30a1	NM_009579	0.00300579	-1.37382
NM_172896 // Nlrp4a // NLR family, pyrin domain containing 4A // 7 A3 // 243880 /// ENS	Nlrp4a	NM_172896	0.0370067	-1.37331
NM_007431 // Alpl // alkaline phosphatase, liver/bone/kidney // 4 D3|4 70.2 cM // 11647	Alpl	NM_007431	0.00444905	-1.37296
NM_008846 // Pip5k1b // phosphatidylinositol-4-phosphate 5-kinase, type 1 beta // 19 C1	Pip5k1b	NM_008846	0.00128319	-1.37206
NM_009021 // Rai1 // retinoic acid induced 1 // 11 B2 // 19377 /// NM_001037764 // Rai1	Rai1	NM_009021	0.003359	-1.3689
NM_177732 // Slc35d1 // solute carrier family 35 (UDP-glucuronic acid/UDP-N-acetylgalac	Slc35d1	NM_177732	0.00724147	-1.36874
NM_010016 // Cd55 // CD55 antigen // 1 E4|1 67.6 cM // 13136 /// ENSMUST00000027650 //	Cd55	NM_010016	0.00624429	-1.36845
NM_178280 // Sall3 // sal-like 3 (Drosophila) // 18 E3 // 20689 /// ENSMUST00000057950	Sall3	NM_178280	0.0183838	-1.36811
NM_001160018 // Tor1aip1 // torsin A interacting protein 1 // 1 G3 // 208263 /// NM_144	Tor1aip1	NM_001160018	0.00114524	-1.36739
NM_025635 // Zwint // ZW10 interactor // 10 B5.3|10 38.0 cM // 52696 /// ENSMUST0000010	Zwint	NM_025635	0.00146049	-1.3669
NM_024436 // Rab22a // RAB22A, member RAS oncogene family // 2 H4|2 100.5 cM // 19334 /	Rab22a	NM_024436	0.0023037	-1.36626
NM_001163170 // Lix1l // Lix1-like // 3 F2.1 // 280411 /// ENSMUST00000062058 // Lix1l	Lix1l	NM_001163170	0.0346296	-1.36603
NM_183034 // Plekhm1 // pleckstrin homology domain containing, family M (with RUN domai	Plekhm1	NM_183034	0.00451952	-1.36548
NM_008775 // Pafah1b2 // platelet-activating factor acetylhydrolase, isoform 1b, subuni	Pafah1b2	NM_008775	0.00342207	-1.36547
NM_138593 // Larp7 // La ribonucleoprotein domain family, member 7 // 3 G2|3 62.9 cM //	Larp7	NM_138593	0.00676223	-1.36423
NM_175645 // Xylt1 // xylosyltransferase 1 // 7 F2 // 233781 /// ENSMUST00000032892 //	Xylt1	NM_175645	0.0176668	-1.36403
NM_001013371 // Dtx3l // deltex 3-like (Drosophila) // 16 B3 // 209200 /// NM_030253 //	Dtx3l	NM_001013371	0.0377882	-1.36354
NM_173424 // Zbtb37 // zinc finger and BTB domain containing 37 // 1 H2.1 // 240869 ///	Zbtb37	NM_173424	0.0133296	-1.36238
NM_145933 // St6gal1 // beta galactoside alpha 2,6 sialyltransferase 1 // 16 B1|16 15.5	St6gal1	NM_145933	0.00184438	-1.36208
NM_013912 // Apln // apelin // X A3.2 // 30878 /// ENSMUST00000039026 // Apln // apelin	Apln	NM_013912	0.0172335	-1.36138
NM_019588 // Plce1 // phospholipase C, epsilon 1 // 19 D1 // 74055 /// ENSMUST000000259	Plce1	NM_019588	0.0183155	-1.36123
NM_144822 // Cbara1 // calcium binding atopy-related autoantigen 1 // 10 B4 // 216001 /	Cbara1	NM_144822	0.00700953	-1.36094
NM_001024717 // Gal3st3 // galactose-3-O-sulfotransferase 3 // 19 A // 545276 /// ENSMU	Gal3st3	NM_001024717	0.00352069	-1.36015
NM_183138 // Tet3 // tet oncogene family member 3 // 6 C3 // 194388	Tet3	NM_183138	0.0391733	-1.36013
NM_021389 // Sh3kbp1 // SH3-domain kinase binding protein 1 // X F4 // 58194 /// NM_001	Sh3kbp1	NM_021389	0.0092597	-1.35966
NM_027649 // Spats1 // spermatogenesis associated, serine-rich 1 // 17 C // 71020 /// E	Spats1	NM_027649	0.0328616	-1.35858
ENSMUST00000049544 // Ccdc141 // coiled-coil domain containing 141 // 2 C3 // 545428	Ccdc141	ENSMUST00000049544	0.0289638	-1.35774
NM_008402 // Itgav // integrin alpha V // 2 D|2 46.0 cM // 16410 /// ENSMUST00000028499	Itgav	NM_008402	0.00703073	-1.35759
NM_026013 // Dram2 // VDNA-damage regulated autophagy modulator 2 // 3 F3 // 67171 ///	Dram2	NM_026013	0.0012915	-1.35723
NM_178606 // Reep3 // receptor accessory protein 3 // 10 B5.1|10 30.0 cM // 28193 /// E	Reep3	NM_178606	0.00524893	-1.35688
NM_153567 // Slain2 // SLAIN motif family, member 2 // 5 C3.2 // 75991 /// NM_001113423	Slain2	NM_153567	0.000507888	-1.35604
NM_018807 // Plagl2 // pleiomorphic adenoma gene-like 2 // 2 H2 // 54711 /// ENSMUST000	Plagl2	NM_018807	0.00330634	-1.35597
NM_013822 // Jag1 // jagged 1 // 2 F3|2 77.0 cM // 16449 /// ENSMUST00000028735 // Jag1	Jag1	NM_013822	0.0459003	-1.35572
NM_145970 // Cc2d1a // coiled-coil and C2 domain containing 1A // 8 C3 // 212139 /// EN	Cc2d1a	NM_145970	0.00190154	-1.3546
NM_007486 // Arhgdib // Rho, GDP dissociation inhibitor (GDI) beta // 6 G1 // 11857 ///	Arhgdib	NM_007486	0.00622558	-1.35431
NM_015808 // Krtap5-1 // keratin associated protein 5-1 // 7 F5 // 50774	Krtap5-1	NM_015808	0.00815847	-1.35374
NM_173866 // Gpt2 // glutamic pyruvate transaminase (alanine aminotransferase) 2 // 8 C	Gpt2	NM_173866	0.0297803	-1.35313
NM_011243 // Rarb // retinoic acid receptor, beta // 14 A1-A3 // 218772 /// ENSMUST0000	Rarb	NM_011243	0.00778015	-1.35292
NM_198306 // Galnt9 // UDP-N-acetyl-alpha-D-galactosamine:polypeptide N-acetylgalactosa	Galnt9	NM_198306	0.00475044	-1.35287
NM_177136 // Fryl // furry homolog-like (Drosophila) // 5 C3.2 // 72313 /// NM_028194 /	Fryl	NM_177136	0.012545	-1.35189
NM_001033322 // Gucy1a2 // guanylate cyclase 1, soluble, alpha 2 // 9 A1 // 234889 ///	Gucy1a2	NM_001033322	0.00458148	-1.35159
NM_028421 // Zc3hav1 // zinc finger CCCH type, antiviral 1 // 6 B1 // 78781 /// NM_0288	Zc3hav1	NM_028421	0.019066	-1.3514
NM_172739 // Grlf1 // glucocorticoid receptor DNA binding factor 1 // 7 A2 // 232906 //	Grlf1	NM_172739	0.0131256	-1.35077
NR_015511 // E030011O05Rik // RIKEN cDNA E030011O05 gene // 9 E3.3 // 319859 /// ENSMUS	E030011O05Rik	NR_015511	0.00178595	-1.35029
NM_009985 // Ctsw // cathepsin W // 19 A // 13041 /// ENSMUST00000025844 // Ctsw // cat	Ctsw	NM_009985	0.0327852	-1.34971
NM_010832 // Msl3 // male-specific lethal 3 homolog (Drosophila) // X F5 // 17692 /// E	Msl3	NM_010832	0.00412672	-1.3488
NM_172870 // Bnc2 // basonuclin 2 // 4 C4 // 242509 /// ENSMUST00000107198 // Bnc2 // b	Bnc2	NM_172870	0.048017	-1.34876
NM_009498 // Vamp3 // vesicle-associated membrane protein 3 // 4 E1 // 22319 /// ENSMUS	Vamp3	NM_009498	0.000375071	-1.34838
BC023444 // Onecut1 // one cut domain, family member 1 // 9 D|9 42.0 cM // 15379 /// EN	Onecut1	BC023444	0.0495175	-1.34833
NM_013680 // Syn1 // synapsin I // X A1-A4|X 6.2 cM // 20964 /// NM_001110780 // Syn1 /	Syn1	NM_013680	0.0026547	-1.34795
BC040401 // 4933426M11Rik // RIKEN cDNA 4933426M11 gene // 12 D1 // 217684 /// ENSMUST0	4933426M11Rik	BC040401	0.0144793	-1.34787
NM_177225 // Samd12 // sterile alpha motif domain containing 12 // 15 C-D1 // 320679 //	Samd12	NM_177225	0.0308795	-1.34776
NM_177545 // Vangl1 // vang-like 1 (van gogh, Drosophila) // 3 F2.2 // 229658 /// NM_00	Vangl1	NM_177545	0.00575232	-1.34733
NM_011943 // Map2k6 // mitogen-activated protein kinase kinase 6 // 11 E1 // 26399 ///	Map2k6	NM_011943	0.0492827	-1.34717
NM_023835 // Trim12 // tripartite motif-containing 12 // 7 E3 // 76681 /// ENSMUST00000	Trim12	NM_023835	0.0198556	-1.346
NM_011076 // Abcb1a // ATP-binding cassette, sub-family B (MDR/TAP), member 1A // 5 A1|	Abcb1a	NM_011076	0.00980211	-1.34537
NM_001033209 // Xylb // xylulokinase homolog (H. influenzae) // 9 F3 // 102448 /// ENSM	Xylb	NM_001033209	0.00407661	-1.34472
NM_019922 // Crtap // cartilage associated protein // 9 F3-F4 // 56693 /// ENSMUST00000	Crtap	NM_019922	0.00392077	-1.34421
NM_010560 // Il6st // interleukin 6 signal transducer // 13 D2.2|13 67.0 cM // 16195 //	Il6st	NM_010560	0.00128337	-1.34411
NM_001005510 // Syne2 // synaptic nuclear envelope 2 // 12 C3 // 319565	Syne2	NM_001005510	0.0168215	-1.34395
NM_009535 // Yes1 // Yamaguchi sarcoma viral (v-yes) oncogene homolog 1 // 5 B1|5 18.2	Yes1	NM_009535	0.0125591	-1.34389
NM_199149 // Lrrc68 // leucine rich repeat containing 68 // 7 A3 // 232947 /// ENSMUST0	Lrrc68	NM_199149	0.000628553	-1.34374
NM_001145884 // Itgb5 // integrin beta 5 // 16 B3 // 16419 /// NM_010580 // Itgb5 // in	Itgb5	NM_001145884	0.000450628	-1.34264
NM_011027 // P2rx7 // purinergic receptor P2X, ligand-gated ion channel, 7 // --- // 18	P2rx7	NM_011027	0.0174791	-1.34262
NM_001081499 // Tbc1d8b // TBC1 domain family, member 8B // X F1 // 245638 /// ENSMUST0	Tbc1d8b	NM_001081499	0.0235708	-1.34257
NM_010882 // Ndn // necdin // 7 C|7 28.0 cM // 17984 /// ENSMUST00000038775 // Ndn // n	Ndn	NM_010882	0.00924498	-1.34228
NM_175284 // Fzd10 // frizzled homolog 10 (Drosophila) // 5 G1.3 // 93897 /// ENSMUST00	Fzd10	NM_175284	0.0269464	-1.34189
NM_008719 // Npas2 // neuronal PAS domain protein 2 // 1 B|1 20.0 cM // 18143 /// ENSMU	Npas2	NM_008719	0.00378653	-1.33966
NM_138309 // Cd99l2 // CD99 antigen-like 2 // X A6-B // 171486 /// ENSMUST00000080035 /	Cd99l2	NM_138309	0.0231848	-1.33966
NM_198660 // E230008N13Rik // RIKEN cDNA E230008N13 gene // 4 B1 // 381522	E230008N13Rik	NM_198660	0.0363552	-1.33929
NM_010877 // Ncf2 // neutrophil cytosolic factor 2 // 1 G3|1 76.1 cM // 17970 /// ENSMU	Ncf2	NM_010877	0.0179423	-1.33873
BC030179 // Fam173b // family with sequence similarity 173, member B // 15 B2 // 68073	Fam173b	BC030179	0.0359201	-1.33792
NM_016769 // Smad3 // MAD homolog 3 (Drosophila) // --- // 17127 /// ENSMUST00000034973	Smad3	NM_016769	0.0309701	-1.33777
NM_029977 // Polq // polymerase (DNA directed), theta // 16 B3|16 38.0 cM // 77782 ///	Polq	NM_029977	0.0260721	-1.33725
NM_001081209 // Prdm14 // PR domain containing 14 // 1 A3 // 383491 /// ENSMUST00000047	Prdm14	NM_001081209	0.0162867	-1.33698
NM_177683 // Vgll4 // vestigial like 4 (Drosophila) // 6 E3 // 232334 /// ENSMUST000000	Vgll4	NM_177683	0.00539635	-1.33668
NR_033450 // Serpina3h // serine (or cysteine) peptidase inhibitor, clade A, member 3H	Serpina3h	NR_033450	0.0166482	-1.3362
NM_007588 // Calcr // calcitonin receptor // 6 A1|6 3.8 cM // 12311 /// NM_001042725 //	Calcr	NM_007588	0.00429606	-1.33612
NM_145575 // Cald1 // caldesmon 1 // 6 B1|6 11.5 cM // 109624 /// ENSMUST00000115021 //	Cald1	NM_145575	0.0103426	-1.3361
NM_013611 // Nodal // nodal // 10 B4|10 31.5 cM // 18119 /// ENSMUST00000049339 // Noda	Nodal	NM_013611	4.42593e-05	-1.33594
NM_007722 // Cxcr7 // chemokine (C-X-C motif) receptor 7 // 1 D|1 55.6 cM // 12778 ///	Cxcr7	NM_007722	0.0223609	-1.33543
NM_001114609 // Ino80d // INO80 complex subunit D // 1 C2 // 227195 /// NM_001081436 //	Ino80d	NM_001114609	0.0158059	-1.33494
NM_022032 // Perp // PERP, TP53 apoptosis effector // 10 A2 // 64058 /// ENSMUST0000001	Perp	NM_022032	0.0139414	-1.33475
NM_028194 // Fryl // furry homolog-like (Drosophila) // 5 C3.2 // 72313 /// ENSMUST0000	Fryl	NM_028194	0.00109005	-1.33455
NM_029131 // 4930503E14Rik // RIKEN cDNA 4930503E14 gene // 14 C1 // 74954 /// ENSMUST0	4930503E14Rik	NM_029131	0.0499675	-1.33445
NM_001026214 // Entpd5 // ectonucleoside triphosphate diphosphohydrolase 5 // 12 E|12 3	Entpd5	NM_001026214	0.0401167	-1.33391
NM_009145 // Nptn // neuroplastin // 9 B // 20320 /// ENSMUST00000034887 // Nptn // neu	Nptn	NM_009145	0.000413238	-1.33293
NM_001163026 // Dnajc13 // DnaJ (Hsp40) homolog, subfamily C, member 13 // 9 F1 // 2355	Dnajc13	NM_001163026	0.043829	-1.3327
NM_008715 // Ints6 // integrator complex subunit 6 // 14 C3 // 18130 /// ENSMUST0000005	Ints6	NM_008715	0.00866552	-1.33234
NM_013834 // Sfrp1 // secreted frizzled-related protein 1 // 8 A2|8 9.5 cM // 20377 ///	Sfrp1	NM_013834	0.0251327	-1.33153
NM_145463 // Shisa2 // shisa homolog 2 (Xenopus laevis) // 14 D1 // 219134 /// ENSMUST0	Shisa2	NM_145463	0.0025912	-1.33145
NM_183195 // Marveld1 // MARVEL (membrane-associating) domain containing 1 // 19 C3 //	Marveld1	NM_183195	0.00239782	-1.33142
NM_145629 // Pls3 // plastin 3 (T-isoform) // X A7.3 // 102866 /// NM_001166453 // Pls3	Pls3	NM_145629	0.0104221	-1.33135
NM_011523 // Synj2 // synaptojanin 2 // 17 A2-A3.1|17 3.3 cM // 20975 /// NM_001113353	Synj2	NM_011523	0.00593424	-1.33126
NM_001042719 // Ddhd1 // DDHD domain containing 1 // 14 C1 // 114874 /// NM_176845 // D	Ddhd1	NM_001042719	0.000532454	-1.33097
NM_011920 // Abcg2 // ATP-binding cassette, sub-family G (WHITE), member 2 // 6 B3|6 28	Abcg2	NM_011920	0.0205314	-1.33095
NM_153178 // Eif2c2 // eukaryotic translation initiation factor 2C, 2 // 15 D3 // 23952	Eif2c2	NM_153178	0.0370585	-1.3305
NM_023844 // Jam2 // junction adhesion molecule 2 // 16 C3.3 // 67374 /// ENSMUST000001	Jam2	NM_023844	0.0308349	-1.33026
NM_133673 // Tor1b // torsin family 1, member B // 2 B // 30934 /// ENSMUST00000028199	Tor1b	NM_133673	0.0152552	-1.32856
ENSMUST00000075602 // Gm7125 // high mobility group nucleosomal binding domain 2 pseudo	Gm7125	ENSMUST00000075602	0.0386185	-1.32805
NM_010917 // Nid1 // nidogen 1 // 13 A1|13 7.0 cM // 18073 /// ENSMUST00000005532 // Ni	Nid1	NM_010917	0.019191	-1.32753
NM_146963 // Olfr45 // olfactory receptor 45 // 7 F5 // 18344 /// ENSMUST00000084454 //	Olfr45	NM_146963	0.000792375	-1.32694
NM_134112 // Kctd1 // potassium channel tetramerisation domain containing 1 // 18 A1 //	Kctd1	NM_134112	0.00104102	-1.32659
NM_001177573 // BB287469 // expressed sequence BB287469 // 12 D2|12 // 544881 /// NM_00	BB287469	NM_001177573	0.0435441	-1.32658
NM_021607 // Ncstn // nicastrin // 1 H3|1 93.5 cM // 59287 /// NM_009938 // Copa // coa	Ncstn	NM_021607	0.0136273	-1.32651
NM_026820 // Ifitm1 // interferon induced transmembrane protein 1 // 7 F5 // 68713 ///	Ifitm1	NM_026820	0.00171438	-1.32594
NM_146055 // 2610301G19Rik // RIKEN cDNA 2610301G19 gene // 14 D2 // 219158 /// ENSMUST	2610301G19Rik	NM_146055	0.00231816	-1.32578
NM_027533 // Tspan2 // tetraspanin 2 // 3 F3 // 70747 /// ENSMUST00000029451 // Tspan2	Tspan2	NM_027533	0.01099	-1.32576
NM_138593 // Larp7 // La ribonucleoprotein domain family, member 7 // 3 G2|3 62.9 cM //	Larp7	NM_138593	0.0142557	-1.32558
NM_008630 // Mt2 // metallothionein 2 // 8 C5|8 45.0 cM // 17750 /// ENSMUST00000034214	Mt2	NM_008630	0.0239854	-1.32523
NM_001045959 // Mink1 // misshapen-like kinase 1 (zebrafish) // 11 B4 // 50932 /// NM_0	Mink1	NM_001045959	0.000222614	-1.325
NM_007483 // Rhob // ras homolog gene family, member B // 12 A1.1 // 11852 /// ENSMUST0	Rhob	NM_007483	0.0103854	-1.32464
NM_010189 // Fcgrt // Fc receptor, IgG, alpha chain transporter // 7 B4|7 23.0 cM // 14	Fcgrt	NM_010189	0.0320603	-1.32416
NM_010028 // Ddx3x // DEAD/H (Asp-Glu-Ala-Asp/His) box polypeptide 3, X-linked // X A1.	Ddx3x	NM_010028	0.0189117	-1.32409
NM_028444 // Prkcdbp // protein kinase C, delta binding protein // 7 F1 // 109042 /// E	Prkcdbp	NM_028444	0.00393078	-1.32403
NM_001001559 // Dub2a // deubiquitinating enzyme 2a // 7 E3 // 384701 /// NR_033576 //	Dub2a	NM_001001559	0.0426284	-1.32203
NM_170755 // Fam134a // family with sequence similarity 134, member A // 1 C3 // 227298	Fam134a	NM_170755	0.0082607	-1.32196
NM_138679 // Ash1l // ash1 (absent, small, or homeotic)-like (Drosophila) // 3 F1 // 19	Ash1l	NM_138679	0.0030319	-1.32184
NM_025707 // Klhl28 // kelch-like 28 (Drosophila) // 12 C1 // 66689 /// ENSMUST00000021	Klhl28	NM_025707	0.00430147	-1.32165
NM_175136 // Rnf122 // ring finger protein 122 // 8 A3 // 68867 /// ENSMUST00000046941	Rnf122	NM_175136	0.017642	-1.32124
NM_008377 // Lrig1 // leucine-rich repeats and immunoglobulin-like domains 1 // 6 D2|6	Lrig1	NM_008377	0.0478697	-1.32097
ENSMUST00000097330 // EG547347 // predicted gene, EG547347 // 17 B1|17 // 547347	EG547347	ENSMUST00000097330	0.00366216	-1.32058
NM_001159417 // Irf9 // interferon regulatory factor 9 // 14 C3|14 21.5 cM // 16391 ///	Irf9	NM_001159417	0.00287874	-1.32023
NM_001081097 // Grik3 // glutamate receptor, ionotropic, kainate 3 // 4 D2.2|4 57.2 cM	Grik3	NM_001081097	0.0200186	-1.31872
NM_009555 // Zfp40 // zinc finger protein 40 // 17 A3.3|17 10.05 cM // 22700 /// ENSMUS	Zfp40	NM_009555	0.0171219	-1.31865
NM_028968 // Ifitm7 // interferon induced transmembrane protein 7 // 16 A1 // 74482 ///	Ifitm7	NM_028968	0.0453642	-1.31806
NM_010028 // Ddx3x // DEAD/H (Asp-Glu-Ala-Asp/His) box polypeptide 3, X-linked // X A1.	Ddx3x	NM_010028	0.0185546	-1.31802
BC139455 // 2210010C17Rik // RIKEN cDNA 2210010C17 gene // 7 A3 // 70080 /// NM_027308	2210010C17Rik	BC139455	0.00277583	-1.31741
NM_138587 // Fam3c // family with sequence similarity 3, member C // 6 A3.1|6 2.0 cM //	Fam3c	NM_138587	0.00533677	-1.31706
NM_054087 // Slc19a2 // solute carrier family 19 (thiamine transporter), member 2 // 1	Slc19a2	NM_054087	0.0192393	-1.31697
NM_008018 // Sh3pxd2a // SH3 and PX domains 2A // 19 D2 // 14218 /// NM_001164717 // Sh	Sh3pxd2a	NM_008018	0.00228146	-1.31694
NM_182930 // Plekha6 // pleckstrin homology domain containing, family A member 6 // 1 E	Plekha6	NM_182930	0.045416	-1.31694
NM_027886 // Stk11ip // serine/threonine kinase 11 interacting protein // 1 C3 // 71728	Stk11ip	NM_027886	0.0160716	-1.31597
NM_001110208 // Akt2 // thymoma viral proto-oncogene 2 // 7 B1|7 6.5 cM // 11652 /// NM	Akt2	NM_001110208	0.0042496	-1.31564
NM_018760 // Slc4a4 // solute carrier family 4 (anion exchanger), member 4 // 5 E2 // 5	Slc4a4	NM_018760	0.00322443	-1.31491
NM_133201 // Mfn2 // mitofusin 2 // 4 E2 // 170731 /// ENSMUST00000030884 // Mfn2 // mi	Mfn2	NM_133201	0.00351618	-1.31443
NM_001081039 // Dock9 // dedicator of cytokinesis 9 // 14 E5|14 67.0 cM // 105445 /// N	Dock9	NM_001081039	0.0059736	-1.31407
NR_024093 // Zfp91-Cntf // Zfp91-Cntf readthrough transcript // 19 A|19 // 664779 /// N	Zfp91-Cntf	NR_024093	0.00339093	-1.31404
NR_027373 // Arhgap1 // Rho GTPase activating protein 1 // 2 E1 // 228359 /// NM_146124	Arhgap1	NR_027373	0.00524737	-1.31363
NM_001146350 // Eng // endoglin // 2 B|2 21.4 cM // 13805 /// NM_007932 // Eng // endog	Eng	NM_001146350	0.00802025	-1.31325
NM_013529 // Gfpt2 // glutamine fructose-6-phosphate transaminase 2 // 11 B1.2|11 26.0	Gfpt2	NM_013529	0.00177907	-1.31322
NM_007920 // Elf1 // E74-like factor 1 // 14 D3 // 13709 /// ENSMUST00000110835 // Elf1	Elf1	NM_007920	0.0044275	-1.31321
NM_009830 // Ccne2 // cyclin E2 // 4 A2 // 12448 /// NM_001159595 // Ints8 // integrato	Ccne2	NM_009830	0.0119475	-1.31274
NM_024209 // Ppp6c // protein phosphatase 6, catalytic subunit // 2 B // 67857 /// ENSM	Ppp6c	NM_024209	0.000171128	-1.31259
ENSMUST00000088383 // Gm14243 // predicted gene 14243 // --- // 100126880	Gm14243	ENSMUST00000088383	0.0378387	-1.31238
NM_172958 // Mtmr12 // myotubularin related protein 12 // 15 A1 // 268783 /// ENSMUST00	Mtmr12	NM_172958	0.0139132	-1.31173
NM_009194 // Slc12a2 // solute carrier family 12, member 2 // 18 D3|18 32.0 cM // 20496	Slc12a2	NM_009194	0.0264321	-1.31159
NM_007405 // Adcy6 // adenylate cyclase 6 // 15 F // 11512 /// ENSMUST00000096224 // Ad	Adcy6	NM_007405	0.00207215	-1.31153
NM_030197 // 2700078E11Rik // RIKEN cDNA 2700078E11 gene // 19 D3 // 78832 /// NM_00117	2700078E11Rik	NM_030197	0.0133616	-1.31142
AK081788 // 1700055N04Rik // RIKEN cDNA 1700055N04 gene // 19 A // 73458 /// XM_895013	1700055N04Rik	AK081788	0.0101123	-1.31103
NM_024477 // Ttc28 // tetratricopeptide repeat domain 28 // 5 F // 209683 /// BC002262	Ttc28	NM_024477	0.0037091	-1.31075
NM_013605 // Muc1 // mucin 1, transmembrane // 3 F1|3 44.8 cM // 17829 /// ENSMUST00000	Muc1	NM_013605	0.0233388	-1.31027
NM_007961 // Etv6 // ets variant gene 6 (TEL oncogene) // 6 G2|6 63.9 cM // 14011 /// E	Etv6	NM_007961	0.0137016	-1.30995
NM_207680 // Bcl2l11 // BCL2-like 11 (apoptosis facilitator) // 2 F3-G1 // 12125 /// NM	Bcl2l11	NM_207680	0.00371147	-1.30966
NM_016687 // Sfrp4 // secreted frizzled-related protein 4 // 13 A2|13 7.0 cM // 20379 /	Sfrp4	NM_016687	0.00734119	-1.30874
NM_009730 // Atrn // attractin // 2 F1|2 73.9 cM // 11990 /// ENSMUST00000028781 // Atr	Atrn	NM_009730	0.00167969	-1.30789
NM_010181 // Fbn2 // fibrillin 2 // 18 D-E1|18 29.0 cM // 14119 /// ENSMUST00000025497	Fbn2	NM_010181	0.00634227	-1.30771
NM_001040072 // Nynrin // NYN domain and retroviral integrase containing // 14 C3 // 27	Nynrin	NM_001040072	0.0312187	-1.30688
NR_028512 // Snora73a // small nucleolar RNA, H/ACA box 73a // 4 D2.3 // 100306944	Snora73a	NR_028512	0.0391763	-1.30617
NM_173865 // Slc41a1 // solute carrier family 41, member 1 // 1 E4 // 98396 /// ENSMUST	Slc41a1	NM_173865	0.000610472	-1.30615
NM_027920 // March8 // membrane-associated ring finger (C3HC4) 8 // --- // 71779 /// EN	2008-03-01	NM_027920	0.0176385	-1.30577
NM_013462 // Adrb3 // adrenergic receptor, beta 3 // 8 A2-A4|8 10.0 cM // 11556 /// ENS	Adrb3	NM_013462	0.0286878	-1.30519
NM_147201 // Nrbp1 // nuclear receptor binding protein 1 // 5 B1 // 192292 /// ENSMUST0	Nrbp1	NM_147201	0.00319936	-1.30488
NM_207659 // Hook3 // hook homolog 3 (Drosophila) // 8 A2 // 320191 /// ENSMUST00000037	Hook3	NM_207659	0.00271491	-1.30397
NM_172700 // Zmpste24 // zinc metallopeptidase, STE24 homolog (S. cerevisiae) // 4 D2.2	Zmpste24	NM_172700	0.0398124	-1.30285
NM_153198 // Hbp1 // high mobility group box transcription factor 1 // 12 A3 // 73389 /	Hbp1	NM_153198	0.000726247	-1.30274
NM_009929 // Col18a1 // collagen, type XVIII, alpha 1 // 10 41.3 cM // 12822 /// NM_001	Col18a1	NM_009929	0.000467268	-1.30232
NM_172050 // Cd300e // CD300e antigen // 11 E2 // 217306 /// ENSMUST00000062787 // Cd30	Cd300e	NM_172050	0.0366778	-1.30222
NM_001024720 // Hmcn1 // hemicentin 1 // 1 G1 // 545370 /// ENSMUST00000074783 // Hmcn1	Hmcn1	NM_001024720	0.00685698	-1.30141
NR_030779 // Ankrd10 // ankyrin repeat domain 10 // 8 A1.1 // 102334 /// NR_030780 // A	Ankrd10	NR_030779	0.00131542	-1.30109
NM_172591 // Fcho2 // FCH domain only 2 // 13 D1 // 218503 /// ENSMUST00000040340 // Fc	Fcho2	NM_172591	0.0369164	-1.30094
NM_139222 // Defb15 // defensin beta 15 // 8 A4 // 246082 /// ENSMUST00000062586 // Def	Defb15	NM_139222	0.0182626	-1.30073
NM_001033167 // Slc22a23 // solute carrier family 22, member 23 // 13 A3.3 // 73102 ///	Slc22a23	NM_001033167	0.00168368	-1.30057
NM_024239 // Stambp // STAM binding protein // 6 C3 // 70527 /// ENSMUST00000068054 //	Stambp	NM_024239	1.51957e-05	-1.30037
NM_001042499 // Rabl3 // RAB, member of RAS oncogene family-like 3 // 16 B3 // 67657 //	Rabl3	NM_001042499	0.0437109	-1.30035
NM_001168277 // Jazf1 // JAZF zinc finger 1 // 6 B3|6 25.9 cM // 231986 /// NM_173406 /	Jazf1	NM_001168277	0.0210208	-1.30009
NM_008844 // Pip5k1c // phosphatidylinositol-4-phosphate 5-kinase, type 1 gamma // 10 C	Pip5k1c	NM_008844	0.000406094	-1.29998
NM_001081139 // Ankrd35 // ankyrin repeat domain 35 // 3 F2.1 // 213121 /// ENSMUST0000	Ankrd35	NM_001081139	0.0292993	-1.29989
NM_001113518 // Arhgef7 // Rho guanine nucleotide exchange factor (GEF7) // 8 A1.1 // 5	Arhgef7	NM_001113518	0.00347792	-1.29958
NM_001045550 // Mup2 // major urinary protein 2 // 4 B3 // 17841 /// NM_001163010 // Mu	Mup2	NM_001045550	0.0494005	-1.29862
NM_176958 // Hif1an // hypoxia-inducible factor 1, alpha subunit inhibitor // 19 D1 //	Hif1an	NM_176958	0.00134331	-1.29858
NR_029730 // Mirlet7e // microRNA let7e // --- // 387248	Mirlet7e	NR_029730	0.0202381	-1.29843
NM_001161731 // Ang // angiogenin, ribonuclease, RNase A family, 5 // 14 B-C1|14 18.0 c	Ang	NM_001161731	0.00284287	-1.29835
NM_001024918 // Rfx4 // regulatory factor X, 4 (influences HLA class II expression) //	Rfx4	NM_001024918	0.0242208	-1.29829
NM_172673 // Frmd5 // FERM domain containing 5 // 2 E5 // 228564 /// ENSMUST00000110593	Frmd5	NM_172673	0.00018828	-1.29809
NM_011544 // Tcf12 // transcription factor 12 // 9 D|9 42.0 cM // 21406 /// ENSMUST0000	Tcf12	NM_011544	0.0140184	-1.29799
NM_172409 // Fmnl2 // formin-like 2 // 2 C1.1 // 71409 /// ENSMUST00000049483 // Fmnl2	Fmnl2	NM_172409	0.0212776	-1.29666
NM_025378 // Ifitm3 // interferon induced transmembrane protein 3 // 7 F5 // 66141 ///	Ifitm3	NM_025378	0.00191436	-1.29662
NM_015755 // Hunk // hormonally upregulated Neu-associated kinase // 16 C3.3|16 58.0 cM	Hunk	NM_015755	0.00272699	-1.29644
NM_133852 // Golga2 // golgi autoantigen, golgin subfamily a, 2 // 2 B // 99412 /// NM_	Golga2	NM_133852	0.000307621	-1.29624
NM_153080 // Tom1l2 // target of myb1-like 2 (chicken) // 11 B2 // 216810 /// NM_001039	Tom1l2	NM_153080	0.00575609	-1.29615
NM_009616 // Adam19 // a disintegrin and metallopeptidase domain 19 (meltrin beta) // 1	Adam19	NM_009616	0.0141115	-1.2961
NM_010773 // Mbd2 // methyl-CpG binding domain protein 2 // 18 E2|18 44.0 cM // 17191 /	Mbd2	NM_010773	0.00268722	-1.29558
NM_013659 // Sema4b // sema domain, immunoglobulin domain (Ig), transmembrane domain (T	Sema4b	NM_013659	0.00767624	-1.29527
NM_001163575 // Parp10 // poly (ADP-ribose) polymerase family, member 10 // 15 D3 // 67	Parp10	NM_001163575	0.0099001	-1.29502
NM_025283 // Mobkl3 // MOB1, Mps One Binder kinase activator-like 3 (yeast) // 1 C1 //	Mobkl3	NM_025283	5.27014e-05	-1.29488
NM_009384 // Tiam1 // T-cell lymphoma invasion and metastasis 1 // 16 61.8 cM // 21844	Tiam1	NM_009384	0.00317585	-1.29472
NM_011682 // Utrn // utrophin // 10 A1|10 3.0 cM // 22288 /// ENSMUST00000076817 // Utr	Utrn	NM_011682	0.00478908	-1.29466
NM_133962 // Arhgef18 // rho/rac guanine nucleotide exchange factor (GEF) 18 // 8 A1.1	Arhgef18	NM_133962	0.00628114	-1.29446
NM_134020 // Tmed4 // transmembrane emp24 protein transport domain containing 4 // 11 A	Tmed4	NM_134020	0.00168491	-1.29412
NM_053127 // Pcdhb2 // protocadherin beta 2 // 18 B3 // 93873 /// ENSMUST00000056522 //	Pcdhb2	NM_053127	0.00985001	-1.29399
NM_001111027 // Runx1t1 // runt-related transcription factor 1; translocated to, 1 (cyc	Runx1t1	NM_001111027	0.00750054	-1.29375
NM_001012726 // Aym1 // activator of yeast meiotic promoters 1 // 5 F|5 65.0 cM // 5036	Aym1	NM_001012726	0.0160236	-1.29308
NM_207685 // Elavl2 // ELAV (embryonic lethal, abnormal vision, Drosophila)-like 2 (Hu	Elavl2	NM_207685	0.00363045	-1.29298
NM_023792 // Pank1 // pantothenate kinase 1 // 19 G1-G3|19 // 75735 /// NM_001114339 //	Pank1	NM_023792	0.000848145	-1.29282
NM_172380 // Ktelc1 // KTEL (Lys-Tyr-Glu-Leu) containing 1 // 16 B4 // 224143 /// ENSMU	Ktelc1	NM_172380	0.00375971	-1.2925
NM_007916 // Ddx19a // DEAD (Asp-Glu-Ala-Asp) box polypeptide 19a // 8 D3 // 13680 ///	Ddx19a	NM_007916	0.000897725	-1.29231
NM_010296 // Gli1 // GLI-Kruppel family member GLI1 // 10 D3|10 69.0 cM // 14632 /// EN	Gli1	NM_010296	0.0231553	-1.29194
AY616753 // Grxcr1 // glutaredoxin, cysteine rich 1 // 5 C3.1 // 433899 /// AY616753 //	Grxcr1	AY616753	0.0359395	-1.29148
NM_172516 // Dstyk // dual serine/threonine and tyrosine protein kinase // 1 E4 // 2134	Dstyk	NM_172516	0.00563295	-1.29104
NM_134148 // Carns1 // carnosine synthase 1 // 19 A // 107239 /// BC023699 // Carns1 //	Carns1	NM_134148	0.0151379	-1.29087
NM_013671 // Sod2 // superoxide dismutase 2, mitochondrial // 17 A1|17 7.6 cM // 20656	Sod2	NM_013671	0.011197	-1.29086
NM_176930 // Nrcam // neuron-glia-CAM-related cell adhesion molecule // 12 B3 // 319504	Nrcam	NM_176930	0.0098861	-1.29077
NM_030709 // Tmprss5 // transmembrane protease, serine 5 (spinesin) // --- // 80893 ///	Tmprss5	NM_030709	0.012112	-1.29072
NM_001024720 // Hmcn1 // hemicentin 1 // 1 G1 // 545370 /// ENSMUST00000074783 // Hmcn1	Hmcn1	NM_001024720	0.0350833	-1.29065
NM_026480 // Ooep // oocyte expressed protein homolog (dog) // 9 E1 // 67968 /// ENSMUS	Ooep	NM_026480	0.00984236	-1.29062
NM_009812 // Casp8 // caspase 8 // 1 B|1 30.1 cM // 12370 /// NM_001080126 // Casp8 //	Casp8	NM_009812	0.0127833	-1.29031
NM_001024624 // Cdkl5 // cyclin-dependent kinase-like 5 // X F4 // 382253 /// ENSMUST00	Cdkl5	NM_001024624	0.00364165	-1.29028
NM_001177648 // Fnbp1 // formin binding protein 1 // 2 B // 14269 /// NM_001038700 // F	Fnbp1	NM_001177648	0.0033978	-1.29011
NM_031182 // Tcfap4 // transcription factor AP4 // 16 A1|16 2.5 cM // 83383 /// ENSMUST	Tcfap4	NM_031182	0.0282293	-1.28965
NM_011156 // Prep // prolyl endopeptidase // 10 B2-B3|10 28.5 cM // 19072 /// ENSMUST00	Prep	NM_011156	0.00176461	-1.28939
NM_008981 // Ptprg // protein tyrosine phosphatase, receptor type, G // 14 A2|14 2.0 cM	Ptprg	NM_008981	0.0133809	-1.28938
NM_001005608 // Itgb4 // integrin beta 4 // 11 E2|11 76.0 cM // 192897 /// NM_133663 //	Itgb4	NM_001005608	0.00448001	-1.2892
NM_011670 // Uchl1 // ubiquitin carboxy-terminal hydrolase L1 // 5 C3.1|5 36.0 cM // 22	Uchl1	NM_011670	0.00193395	-1.28904
NM_001039515 // Arl4a // ADP-ribosylation factor-like 4A // 12 B1|12 25.0 cM // 11861 /	Arl4a	NM_001039515	0.00829052	-1.2889
NM_175091 // Tnks // tankyrase, TRF1-interacting ankyrin-related ADP-ribose polymerase	Tnks	NM_175091	0.000217709	-1.28848
NM_011817 // Gadd45g // growth arrest and DNA-damage-inducible 45 gamma // 13 A5-B // 2	Gadd45g	NM_011817	0.0165134	-1.2883
NM_011785 // Akt3 // thymoma viral proto-oncogene 3 // 1 H4-H6 // 23797 /// ENSMUST0000	Akt3	NM_011785	0.0229502	-1.28806
NM_029793 // Golga1 // golgi autoantigen, golgin subfamily a, 1 // 2 B // 76899 /// ENS	Golga1	NM_029793	0.000613256	-1.28798
NM_001033207 // Nlrc5 // NLR family, CARD domain containing 5 // 8 C5 // 434341 /// FJ8	Nlrc5	NM_001033207	0.00465929	-1.28719
NM_007578 // Cacna1a // calcium channel, voltage-dependent, P/Q type, alpha 1A subunit	Cacna1a	NM_007578	0.000576406	-1.28711
NM_008634 // Mtap1b // microtubule-associated protein 1B // 13 D1|13 51.0 cM // 17755 /	Mtap1b	NM_008634	0.0233186	-1.28671
NM_172497 // Efhb // EF hand domain family, member B // 17 C // 211482 /// ENSMUST00000	Efhb	NM_172497	0.026662	-1.28633
NM_013584 // Lifr // leukemia inhibitory factor receptor // 15 A1|15 4.6 cM // 16880 //	Lifr	NM_013584	0.0368052	-1.28621
NM_008960 // Pten // phosphatase and tensin homolog // 19 C1|19 24.5 cM // 19211 /// EN	Pten	NM_008960	0.00307366	-1.28612
NM_011715 // Wdr1 // WD repeat domain 1 // 5 B3|5 24.0 cM // 22388 /// ENSMUST000000052	Wdr1	NM_011715	0.0232125	-1.28539
NM_001163026 // Dnajc13 // DnaJ (Hsp40) homolog, subfamily C, member 13 // 9 F1 // 2355	Dnajc13	NM_001163026	0.0445013	-1.28487
NM_001177535 // Gm4340 // predicted gene 4340 // 10 D1|10 // 100043292 /// NM_001166637	Gm4340	NM_001177535	0.008196	-1.2844
NM_029023 // Scpep1 // serine carboxypeptidase 1 // 11 C // 74617 /// ENSMUST0000000028	Scpep1	NM_029023	0.00536376	-1.28436
NM_001168541 // Tsku // tsukushin // 7 E2 // 244152 /// NM_001168540 // Tsku // tsukush	Tsku	NM_001168541	0.00236859	-1.28399
NM_001082543 // Stfa1 // stefin A1 // 16 B3|16 22.85 cM // 20861	Stfa1	NM_001082543	0.0467719	-1.28323
NM_009250 // Serpini1 // serine (or cysteine) peptidase inhibitor, clade I, member 1 //	Serpini1	NM_009250	0.0472674	-1.28312
NM_178648 // Ubxn8 // UBX domain protein 8 // 8 A4 // 108159 /// ENSMUST00000095349 //	Ubxn8	NM_178648	0.00530162	-1.28231
NM_007581 // Cacnb3 // calcium channel, voltage-dependent, beta 3 subunit // 15 F1|15 5	Cacnb3	NM_007581	0.0080541	-1.28183
NM_031256 // Plekha3 // pleckstrin homology domain-containing, family A (phosphoinositi	Plekha3	NM_031256	6.72029e-05	-1.28178
NM_013760 // Dnajb9 // DnaJ (Hsp40) homolog, subfamily B, member 9 // 12 B1 // 27362 //	Dnajb9	NM_013760	0.0153743	-1.2811
NM_175263 // Notum // notum pectinacetylesterase homolog (Drosophila) // 11 E2 // 77583	Notum	NM_175263	0.0137136	-1.28107
NM_001081269 // Whsc1l1 // Wolf-Hirschhorn syndrome candidate 1-like 1 (human) // 8 A2	Whsc1l1	NM_001081269	0.0042341	-1.28065
NM_173870 // Mgat4a // mannoside acetylglucosaminyltransferase 4, isoenzyme A // 1 B //	Mgat4a	NM_173870	4.59834e-05	-1.28062
NM_010683 // Lamc1 // laminin, gamma 1 // 1 G3|1 81.1 cM // 226519 /// ENSMUST000000277	Lamc1	NM_010683	0.000362379	-1.28057
NM_144839 // Ube2e2 // ubiquitin-conjugating enzyme E2E 2 (UBC4/5 homolog, yeast) // 14	Ube2e2	NM_144839	0.0266789	-1.28052
NR_029821 // Mir181c // microRNA 181c // --- // 723819	Mir181c	NR_029821	0.000721323	-1.28014
NM_001115130 // Zbtb44 // zinc finger and BTB domain containing 44 // 9 A4 // 235132 //	Zbtb44	NM_001115130	0.0473957	-1.28
ENSMUST00000051601 // Ism2 // isthmin 2 homolog (zebrafish) // 12 D2 // 217738	Ism2	ENSMUST00000051601	0.015775	-1.27984
NM_001085383 // Anxa9 // annexin A9 // 3 F2 // 71790 /// NM_023628 // Anxa9 // annexin	Anxa9	NM_001085383	0.0406871	-1.27974
NM_001077353 // Gsta3 // glutathione S-transferase, alpha 3 // 1 A4|1 15.0 cM // 14859	Gsta3	NM_001077353	0.0203107	-1.27956
NM_011058 // Pdgfra // platelet derived growth factor receptor, alpha polypeptide // 5	Pdgfra	NM_011058	0.0340577	-1.27948
AK082553 // AW822252 // expressed sequence AW822252 // X A5 // 331578 /// XM_001474711	AW822252	AK082553	0.0299333	-1.2791
NM_019392 // Tyro3 // TYRO3 protein tyrosine kinase 3 // 2 F|2 67.1 cM // 22174 /// ENS	Tyro3	NM_019392	0.00675433	-1.27902
ENSMUST00000100136 // Igll1 // immunoglobulin lambda-like polypeptide 1 // 16|16 9.8 cM	Igll1	ENSMUST00000100136	0.0249163	-1.27889
NM_001163026 // Dnajc13 // DnaJ (Hsp40) homolog, subfamily C, member 13 // 9 F1 // 2355	Dnajc13	NM_001163026	0.0440352	-1.2787
NM_181400 // Wdr47 // WD repeat domain 47 // 3 F3 // 99512 /// ENSMUST00000051145 // Wd	Wdr47	NM_181400	0.0454176	-1.27851
NM_024267 // Ipo4 // importin 4 // 14 C3|14 20.0 cM // 75751 /// ENSMUST00000047131 //	Ipo4	NM_024267	0.0479186	-1.27841
NM_008175 // Grn // granulin // 11 D|11 60.0 cM // 14824 /// ENSMUST00000049460 // Grn	Grn	NM_008175	0.00181261	-1.27835
NM_153457 // Rtn1 // reticulon 1 // 12 C3 // 104001 /// NM_001007596 // Rtn1 // reticul	Rtn1	NM_153457	0.000576667	-1.2781
NM_011334 // Clcn4-2 // chloride channel 4-2 // 7 A1|7 4.0 cM // 12727 /// ENSMUST00000	Clcn4-2	NM_011334	0.00613412	-1.27769
NM_029035 // Spsb1 // splA/ryanodine receptor domain and SOCS box containing 1 // 4 E2	Spsb1	NM_029035	0.0457821	-1.27753
NM_023733 // Crot // carnitine O-octanoyltransferase // 5 A1 // 74114 /// ENSMUST000000	Crot	NM_023733	0.00205028	-1.27752
NM_028326 // Zfp618 // zinc fingerprotein 618 // 4 B3 // 72701 /// ENSMUST00000064814 /	Zfp618	NM_028326	0.0194307	-1.27715
NM_001164598 // Irf2bp2 // interferon regulatory factor 2 binding protein 2 // 8 E2 //	Irf2bp2	NM_001164598	0.00557979	-1.27686
NM_001037957 // Dyrk1b // dual-specificity tyrosine-(Y)-phosphorylation regulated kinas	Dyrk1b	NM_001037957	0.00315657	-1.27682
ENSMUST00000056256 // 4933415A04Rik // RIKEN cDNA 4933415A04 gene // 11 B1.1 // 75727	4933415A04Rik	ENSMUST00000056256	0.000912121	-1.27668
NM_029646 // Il34 // interleukin 34 // 8 E1 // 76527 /// NM_001135100 // Il34 // interl	Il34	NM_029646	0.0100033	-1.27614
NM_008856 // Prkch // protein kinase C, eta // 12 C3-D1 // 18755 /// ENSMUST00000021527	Prkch	NM_008856	0.0137884	-1.27584
NM_001109661 // Bach2 // BTB and CNC homology 2 // --- // 12014 /// ENSMUST00000108180	Bach2	NM_001109661	0.00241057	-1.27551
NM_009615 // Adam17 // a disintegrin and metallopeptidase domain 17 // 12 A1.3|12 3.0 c	Adam17	NM_009615	0.00114396	-1.27536
NM_153587 // Rps6ka5 // ribosomal protein S6 kinase, polypeptide 5 // 12 E // 73086 ///	Rps6ka5	NM_153587	0.000526137	-1.27531
NM_030706 // Trim2 // tripartite motif-containing 2 // 3 F1 // 80890 /// ENSMUST0000010	Trim2	NM_030706	0.00163675	-1.27526
NM_010437 // Hivep2 // human immunodeficiency virus type I enhancer binding protein 2 /	Hivep2	NM_010437	0.0469417	-1.2748
NM_001034907 // Zc3h12b // zinc finger CCCH-type containing 12B // X C3 // 547176 /// E	Zc3h12b	NM_001034907	0.0165737	-1.27443
NM_011847 // Dnajb6 // DnaJ (Hsp40) homolog, subfamily B, member 6 // 5 B1 // 23950 ///	Dnajb6	NM_011847	0.0409406	-1.27439
NM_013805 // Cldn5 // claudin 5 // 16 A3|16 11.65 cM // 12741 /// ENSMUST00000043577 //	Cldn5	NM_013805	0.0444746	-1.27421
NM_001166475 // 4930407I10Rik // RIKEN cDNA 4930407I10 gene // 15 E1 // 328573 /// ENSM	4930407I10Rik	NM_001166475	0.0210674	-1.27297
NM_173413 // Rab8b // RAB8B, member RAS oncogene family // 9 C // 235442 /// ENSMUST000	Rab8b	NM_173413	0.0316412	-1.27221
NM_133215 // Mtmr4 // myotubularin related protein 4 // 11 C // 170749 /// ENSMUST00000	Mtmr4	NM_133215	0.000831071	-1.27185
NM_001045550 // Mup2 // major urinary protein 2 // 4 B3 // 17841 /// NM_001163010 // Mu	Mup2	NM_001045550	0.0467201	-1.27104
NM_007437 // Aldh3a2 // aldehyde dehydrogenase family 3, subfamily A2 // 11 B2|11 34.3	Aldh3a2	NM_007437	0.0135562	-1.271
NM_027495 // Tmem144 // transmembrane protein 144 // 3 F1 // 70652 /// ENSMUST000000295	Tmem144	NM_027495	0.0174957	-1.27092
NM_001013829 // Shf // Src homology 2 domain containing F // 2 E5 // 435684 /// ENSMUST	Shf	NM_001013829	0.0101945	-1.27076
XM_994312 // Fam48b1 // family with sequence similarity 48, member B1 // X C3 // 668103	Fam48b1	XM_994312	0.00294157	-1.27065
NM_025785 // Fbxo25 // F-box protein 25 // 8 A1.1 // 66822 /// ENSMUST00000043520 // Fb	Fbxo25	NM_025785	0.00119324	-1.27049
NM_018775 // Tbc1d8 // TBC1 domain family, member 8 // 1 B // 54610 /// ENSMUST00000054	Tbc1d8	NM_018775	0.0186122	-1.27032
NM_010872 // Naip2 // NLR family, apoptosis inhibitory protein 2 // 13 D1|13 54.0 cM //	Naip2	NM_010872	0.0137254	-1.27006
NM_022435 // Sp5 // trans-acting transcription factor 5 // 2 C2|2 40.0 cM // 64406 ///	Sp5	NM_022435	0.0416346	-1.27004
NM_194059 // Nanos3 // nanos homolog 3 (Drosophila) // 8 C3 // 244551 /// ENSMUST000000	Nanos3	NM_194059	0.0302916	-1.26957
ENSMUST00000095981 // Gm8020 // predicted gene 8020 // 14 B // 666280	Gm8020	ENSMUST00000095981	0.0159079	-1.26956
BC031379 // 2610034B18Rik // RIKEN cDNA 2610034B18 gene // 7 D2 // 70420 /// NM_027420	2610034B18Rik	BC031379	0.0113609	-1.26952
NM_011536 // Tbx4 // T-box 4 // 11 C|11 49.0 cM // 21387 /// NM_172798 // Tbx4 // T-box	Tbx4	NM_011536	0.000778207	-1.26891
NM_011847 // Dnajb6 // DnaJ (Hsp40) homolog, subfamily B, member 6 // 5 B1 // 23950 ///	Dnajb6	NM_011847	0.0457152	-1.26861
XR_032603 // Gm7177 // predicted gene 7177 // 17 A2 // 636398	Gm7177	XR_032603	0.00934428	-1.26856
NM_001003909 // Ankib1 // ankyrin repeat and IBR domain containing 1 // 5 A1 // 70797 /	Ankib1	NM_001003909	0.000369763	-1.26845
NM_013906 // Adamts8 // a disintegrin-like and metallopeptidase (reprolysin type) with	Adamts8	NM_013906	0.0194619	-1.2684
NM_008501 // Lif // leukemia inhibitory factor // 11 A1-A2|11 0.25 cM // 16878 /// NM_0	Lif	NM_008501	0.012528	-1.26835
NM_001005868 // Erbb2ip // Erbb2 interacting protein // 13 D1 // 59079 /// NM_021563 //	Erbb2ip	NM_001005868	0.012847	-1.26826
NM_001080746 // Gtf2i // general transcription factor II I // 5 G2|5 75.0 cM // 14886 /	Gtf2i	NM_001080746	0.000213476	-1.26808
NM_011847 // Dnajb6 // DnaJ (Hsp40) homolog, subfamily B, member 6 // 5 B1 // 23950 ///	Dnajb6	NM_011847	0.0420057	-1.26702
NM_008937 // Prox1 // prospero-related homeobox 1 // 1 H6|1 106.3 cM // 19130 /// ENSMU	Prox1	NM_008937	0.0366711	-1.2668
NM_001146007 // 9230105E10Rik // RIKEN cDNA 9230105E10 gene // 7 E3 // 319236 /// NM_17	9230105E10Rik	NM_001146007	0.00635989	-1.26517
NM_177816 // Sh2d4b // SH2 domain containing 4B // 14 B // 328381 /// ENSMUST0000009600	Sh2d4b	NM_177816	0.0156642	-1.26509
NM_001081062 // Ccno // cyclin O // 13 D2.2 // 218630 /// ENSMUST00000038404 // Ccno //	Ccno	NM_001081062	0.0198014	-1.26466
NM_008952 // Pipox // pipecolic acid oxidase // 11 B5|11 44.83 cM // 19193 /// ENSMUST0	Pipox	NM_008952	0.0354954	-1.26456
NM_019696 // Cpxm1 // carboxypeptidase X 1 (M14 family) // 2 F1 // 56264 /// ENSMUST000	Cpxm1	NM_019696	0.00185682	-1.26415
NM_194348 // Atg2a // ATG2 autophagy related 2 homolog A (S. cerevisiae) // 19 A // 329	Atg2a	NM_194348	0.00112146	-1.26351
NM_177618 // Wscd1 // WSC domain containing 1 // 11 B4 // 216881 /// ENSMUST00000021168	Wscd1	NM_177618	0.036206	-1.26346
NM_028235 // Ttc30b // tetratricopeptide repeat domain 30B // 2 C3 // 72421 /// ENSMUST	Ttc30b	NM_028235	0.0245127	-1.26327
NM_001081252 // Uggt2 // UDP-glucose glycoprotein glucosyltransferase 2 // 14 E4 // 664	Uggt2	NM_001081252	0.0327004	-1.26283
NM_008216 // Has2 // hyaluronan synthase 2 // 15 D1|15 31.2 cM // 15117 /// ENSMUST0000	Has2	NM_008216	0.00681243	-1.26263
NM_172862 // Frem2 // Fras1 related extracellular matrix protein 2 // 3 C // 242022 ///	Frem2	NM_172862	0.0338135	-1.26248
NR_029533 // Mir30a // microRNA 30a // --- // 387225	Mir30a	NR_029533	0.0042198	-1.26195
NM_133853 // Magi3 // membrane associated guanylate kinase, WW and PDZ domain containin	Magi3	NM_133853	0.00781576	-1.26189
NM_028756 // Slc35a5 // solute carrier family 35, member A5 // 16 B5|16 29.9 cM // 7410	Slc35a5	NM_028756	0.00959628	-1.26178
NM_198109 // Ssh1 // slingshot homolog 1 (Drosophila) // 5 F // 231637 /// ENSMUST00000	Ssh1	NM_198109	0.00162667	-1.26163
NM_178707 // Zfp592 // zinc finger protein 592 // 7 D3 // 233410 /// ENSMUST00000107353	Zfp592	NM_178707	0.000753499	-1.26161
NM_025429 // Serpinb1a // serine (or cysteine) peptidase inhibitor, clade B, member 1a	Serpinb1a	NM_025429	0.00626956	-1.26158
NM_009643 // Ahnak // AHNAK nucleoprotein (desmoyokin) // 19 A // 66395 /// NM_00103995	Ahnak	NM_009643	0.0418889	-1.26145
NM_001170694 // Rcbtb2 // regulator of chromosome condensation (RCC1) and BTB (POZ) dom	Rcbtb2	NM_001170694	0.00021528	-1.26124
NM_008391 // Irf2 // interferon regulatory factor 2 // 8 B2 // 16363 /// ENSMUST0000003	Irf2	NM_008391	0.0421103	-1.26123
NM_173408 // Dcun1d3 // DCN1, defective in cullin neddylation 1, domain containing 3 (S	Dcun1d3	NM_173408	0.00222347	-1.26111
NM_001114097 // Smarcc2 // SWI/SNF related, matrix associated, actin dependent regulato	Smarcc2	NM_001114097	0.0268346	-1.26083
NM_009730 // Atrn // attractin // 2 F1|2 73.9 cM // 11990 /// ENSMUST00000028781 // Atr	Atrn	NM_009730	0.00260841	-1.26045
NM_009831 // Ccng1 // cyclin G1 // 11 B1.1 // 12450 /// ENSMUST00000020576 // Ccng1 //	Ccng1	NM_009831	0.00132223	-1.26023
NM_001164503 // Akap11 // A kinase (PRKA) anchor protein 11 // 14 D3 // 219181 /// ENSM	Akap11	NM_001164503	0.0356575	-1.26015
NM_024477 // Ttc28 // tetratricopeptide repeat domain 28 // 5 F // 209683 /// BC046779	Ttc28	NM_024477	0.0100851	-1.25988
NM_019707 // Cdh13 // cadherin 13 // 8 E1|8 64.0 cM // 12554 /// ENSMUST00000117160 //	Cdh13	NM_019707	0.0162445	-1.25975
NM_028935 // Zfp558 // zinc finger protein 558 // 9 A3 // 72230	Zfp558	NM_028935	0.00314494	-1.25968
NM_153138 // Wipf1 // WAS/WASL interacting protein family, member 1 // 2 C3|2 43.0 cM /	Wipf1	NM_153138	0.0117427	-1.25945
NM_010661 // Krt12 // keratin 12 // 11 D|11 58.0 cM // 268482 /// ENSMUST00000017741 //	Krt12	NM_010661	0.0133129	-1.25909
NM_001001883 // Hecw2 // HECT, C2 and WW domain containing E3 ubiquitin protein ligase	Hecw2	NM_001001883	0.0169486	-1.2589
NM_001172101 // Rnh1 // ribonuclease/angiogenin inhibitor 1 // 7 F5 // 107702 /// NM_14	Rnh1	NM_001172101	0.00421123	-1.25877
NM_019791 // Maged1 // melanoma antigen, family D, 1 // X C3|X 34.6 cM // 94275 /// ENS	Maged1	NM_019791	0.000841865	-1.25865
NM_172768 // Gramd1b // GRAM domain containing 1B // 9 B // 235283 /// ENSMUST000000456	Gramd1b	NM_172768	0.0108169	-1.25801
NM_001037938 // Dhrs4 // dehydrogenase/reductase (SDR family) member 4 // 14 C3|14 28.0	Dhrs4	NM_001037938	0.0304661	-1.25761
NM_026290 // 4930511I11Rik // RIKEN cDNA 4930511I11 gene // 17 A3.3 // 67645 /// ENSMUS	4930511I11Rik	NM_026290	0.0200257	-1.25747
NM_001177438 // Aldh3b2 // aldehyde dehydrogenase 3 family, member B2 // 19 A // 621603	Aldh3b2	NM_001177438	0.0476956	-1.25734
NM_019760 // Serinc1 // serine incorporator 1 // 10 B4 // 56442 /// ENSMUST00000020027	Serinc1	NM_019760	0.024071	-1.25708
NM_173185 // Csnk1g1 // casein kinase 1, gamma 1 // 9 C // 214897 /// ENSMUST0000003494	Csnk1g1	NM_173185	0.00493769	-1.25697
NR_029649 // Mir298 // microRNA 298 // --- // 723832	Mir298	NR_029649	0.0229631	-1.25653
NM_001159649 // Lax1 // lymphocyte transmembrane adaptor 1 // 1 E4 // 240754 /// NM_172	Lax1	NM_001159649	0.0371904	-1.25646
NM_008249 // Tfb2m // transcription factor B2, mitochondrial // 1 H3|1 97.6 cM // 15278	Tfb2m	NM_008249	0.0115949	-1.2561
NM_020007 // Mbnl1 // muscleblind-like 1 (Drosophila) // --- // 56758 /// ENSMUST000000	Mbnl1	NM_020007	0.0218906	-1.25605
NR_027492 // Hspa13 // heat shock protein 70 family, member 13 // 16 47.2 cM // 110920	Hspa13	NR_027492	0.032379	-1.25549
NM_001081378 // Kidins220 // kinase D-interacting substrate 220 // 12 A1.3 // 77480 ///	Kidins220	NM_001081378	0.010433	-1.25543
NM_008957 // Ptch1 // patched homolog 1 // 13 B3|13 36.0 cM // 19206 /// ENSMUST0000002	Ptch1	NM_008957	0.00587028	-1.25511
NM_198660 // E230008N13Rik // RIKEN cDNA E230008N13 gene // 4 B1 // 381522 /// ENSMUST0	E230008N13Rik	NM_198660	0.00929421	-1.25499
ENSMUST00000075576 // Ankrd33b // ankyrin repeat domain 33B // 15 B3.2 // 67434	Ankrd33b	ENSMUST00000075576	0.025306	-1.25485
NM_019637 // Styx // serine/threonine/tyrosine interaction protein // 14 C1 // 56291 //	Styx	NM_019637	0.00201694	-1.25467
NM_027270 // Exoc1 // exocyst complex component 1 // 5 E1|5 // 69940 /// ENSMUST0000011	Exoc1	NM_027270	0.00233986	-1.25459
NM_177632 // Fam43a // family with sequence similarity 43, member A // 16 B2 // 224093	Fam43a	NM_177632	0.00177704	-1.2543
NM_001135192 // Asap2 // ArfGAP with SH3 domain, ankyrin repeat and PH domain 2 // 12 A	Asap2	NM_001135192	0.0370063	-1.25418
NM_025958 // Cand2 // cullin-associated and neddylation-dissociated 2 (putative) // 6 F	Cand2	NM_025958	0.0474198	-1.25406
NM_172924 // C230081A13Rik // RIKEN cDNA C230081A13 gene // 9 B // 244895 /// ENSMUST00	C230081A13Rik	NM_172924	6.12752e-05	-1.25399
NM_028072 // Sulf2 // sulfatase 2 // 2 H3 // 72043 /// ENSMUST00000109249 // Sulf2 // s	Sulf2	NM_028072	0.017584	-1.25394
NM_007606 // Car3 // carbonic anhydrase 3 // 3 A2|3 11.7 cM // 12350 /// ENSMUST0000002	Car3	NM_007606	0.021896	-1.25351
NM_133218 // Zfp704 // zinc finger protein 704 // 3 A1 // 170753 /// ENSMUST00000041124	Zfp704	NM_133218	0.0076052	-1.25295
NM_001113283 // BC031353 // cDNA sequence BC031353 // 9 D // 235493 /// NM_153584 // BC	BC031353	NM_001113283	0.00124591	-1.25264
NM_146954 // Olfr535 // olfactory receptor 535 // --- // 258956 /// ENSMUST00000074897	Olfr535	NM_146954	0.00170718	-1.25263
NR_033190 // Gm839 // predicted gene 839 // 6 D1 // 330379 /// BC147090 // Gm839 // pre	Gm839	NR_033190	0.00358734	-1.25243
NM_178267 // Zfp827 // zinc finger protein 827 // 8 C1-C2 // 622675 /// ENSMUST00000119	Zfp827	NM_178267	0.00427995	-1.25216
NM_001163026 // Dnajc13 // DnaJ (Hsp40) homolog, subfamily C, member 13 // 9 F1 // 2355	Dnajc13	NM_001163026	0.0345588	-1.2519
NM_008249 // Tfb2m // transcription factor B2, mitochondrial // 1 H3|1 97.6 cM // 15278	Tfb2m	NM_008249	0.0116611	-1.25147
NM_008076 // Gabrr2 // gamma-aminobutyric acid (GABA) C receptor, subunit rho 2 // 4 A5	Gabrr2	NM_008076	0.0330434	-1.25145
NM_031392 // Wdr6 // WD repeat domain 6 // 9 F2 // 83669 /// ENSMUST00000068700 // Wdr6	Wdr6	NM_031392	0.0367322	-1.25138
NM_010351 // Gsc // goosecoid homeobox // 12 E|12 52.0 cM // 14836 /// ENSMUST000000215	Gsc	NM_010351	0.0188365	-1.25135
NM_023066 // Asph // aspartate-beta-hydroxylase // 4 A1 // 65973 /// NM_001177849 // As	Asph	NM_023066	0.000461791	-1.25131
NM_020295 // Lmbr1 // limb region 1 // 5 B1|5 15.8 cM // 56873 /// ENSMUST00000055195 /	Lmbr1	NM_020295	0.0226006	-1.25127
NM_178661 // Creb3l2 // cAMP responsive element binding protein 3-like 2 // 6 B1 // 208	Creb3l2	NM_178661	0.0254738	-1.25113
NM_172913 // Tox3 // TOX high mobility group box family member 3 // 8 C4|8 40.0 cM // 2	Tox3	NM_172913	0.0433258	-1.25093
NM_181586 // Sirt6 // sirtuin 6 (silent mating type information regulation 2, homolog)	Sirt6	NM_181586	0.0228155	-1.25062
NM_176966 // Fsd1l // fibronectin type III and SPRY domain containing 1-like // 4 B2 //	Fsd1l	NM_176966	0.0258838	-1.25038
NM_183208 // Zmiz1 // zinc finger, MIZ-type containing 1 // 14 A3 // 328365 /// ENSMUST	Zmiz1	NM_183208	0.0433664	-1.25011
NM_001040072 // Nynrin // NYN domain and retroviral integrase containing // 14 C3 // 27	Nynrin	NM_001040072	0.0301647	-1.25008
NM_133829 // Mfsd6 // major facilitator superfamily domain containing 6 // 1 C1.1 // 98	Mfsd6	NM_133829	0.0298426	-1.24996
NM_019802 // Ggcx // gamma-glutamyl carboxylase // 6 C3 // 56316 /// ENSMUST00000065906	Ggcx	NM_019802	0.0136015	-1.24983
NM_011267 // Rgs16 // regulator of G-protein signaling 16 // 1 G3|1 78.0 cM // 19734 //	Rgs16	NM_011267	0.0203818	-1.24958
NM_134437 // Il17rd // interleukin 17 receptor D // 14 A3 // 171463 /// ENSMUST00000035	Il17rd	NM_134437	0.00533748	-1.24942
NM_011514 // Suv39h1 // suppressor of variegation 3-9 homolog 1 (Drosophila) // X A1-A2	Suv39h1	NM_011514	0.0357301	-1.24933
NR_029531 // Mir27b // microRNA 27b // --- // 387221	Mir27b	NR_029531	0.00246074	-1.24923
NM_177739 // Zfp507 // zinc finger protein 507 // 7 B2 // 668501 /// ENSMUST00000061586	Zfp507	NM_177739	0.0252518	-1.24895
NM_009253 // Serpina3m // serine (or cysteine) peptidase inhibitor, clade A, member 3M	Serpina3m	NM_009253	0.00235807	-1.24886
NM_177393 // Nalcn // sodium leak channel, non-selective // 14 E5 // 338370 /// ENSMUST	Nalcn	NM_177393	0.0332538	-1.24884
NM_175403 // Mlec // malectin // 5 F|5 60.0 cM // 109154 /// ENSMUST00000112121 // Mlec	Mlec	NM_175403	0.00868526	-1.24869
NM_001081175 // Itpkb // inositol 1,4,5-trisphosphate 3-kinase B // 1 H5|1 100.0 cM //	Itpkb	NM_001081175	0.0243453	-1.24846
NM_001163314 // Pgap1 // post-GPI attachment to proteins 1 // 1 C1.1 // 241062 /// ENSM	Pgap1	NM_001163314	0.0137499	-1.24822
NM_011792 // Bace1 // beta-site APP cleaving enzyme 1 // 9 A5.2 // 23821 /// NM_0011459	Bace1	NM_011792	0.00818296	-1.24809
NM_053103 // Entpd7 // ectonucleoside triphosphate diphosphohydrolase 7 // 19 D1 // 936	Entpd7	NM_053103	0.0288748	-1.24809
NM_008485 // Lamc2 // laminin, gamma 2 // 1 H1|1 81.1 cM // 16782 /// ENSMUST0000002775	Lamc2	NM_008485	0.0358054	-1.24793
NM_001013025 // Tgfbrap1 // transforming growth factor, beta receptor associated protei	Tgfbrap1	NM_001013025	0.0172915	-1.24776
ENSMUST00000110576 // LOC625240 // similar to D5Ertd577e protein // --- // 625240	LOC625240	ENSMUST00000110576	0.050588	-1.2476
NM_145502 // Erlin1 // ER lipid raft associated 1 // 19 C3 // 226144 /// NM_001164359 /	Erlin1	NM_145502	0.0113724	-1.24717
NM_008668 // Nab2 // Ngfi-A binding protein 2 // 10 D3|10 70.0 cM // 17937 /// NM_00112	Nab2	NM_008668	0.0439105	-1.24698
NM_009906 // Tpp1 // tripeptidyl peptidase I // 7 E3|7 50.0 cM // 12751 /// ENSMUST0000	Tpp1	NM_009906	0.00155791	-1.24668
NM_133649 // Slc12a6 // solute carrier family 12, member 6 // 2 E3 // 107723 /// NM_133	Slc12a6	NM_133649	0.00485509	-1.24649
NM_008631 // Mt4 // metallothionein 4 // 8 C5|8 45.0 cM // 17752 /// ENSMUST00000034207	Mt4	NM_008631	0.0027489	-1.24567
NM_008278 // Hpgd // hydroxyprostaglandin dehydrogenase 15 (NAD) // 8 B3.2 // 15446 ///	Hpgd	NM_008278	0.0300819	-1.24563
NM_019637 // Styx // serine/threonine/tyrosine interaction protein // 14 C1 // 56291 //	Styx	NM_019637	0.0013807	-1.24562
NM_031184 // Glis2 // GLIS family zinc finger 2 // 16 A1-B1|16 2.1 cM // 83396 /// ENSM	Glis2	NM_031184	0.0298757	-1.24557
NM_177841 // 4932418E24Rik // RIKEN cDNA 4932418E24 gene // 2 A3 // 329366 /// ENSMUST0	4932418E24Rik	NM_177841	0.0105914	-1.24545
NM_146065 // Atf7 // activating transcription factor 7 // 15 F3 // 223922 /// ENSMUST00	Atf7	NM_146065	0.00508811	-1.24533
NM_001033175 // Cln6 // ceroid-lipofuscinosis, neuronal 6 // 9 B // 76524 /// ENSMUST00	Cln6	NM_001033175	0.0301414	-1.24527
NM_008684 // Neo1 // neogenin // 9 B // 18007 /// NM_001042752 // Neo1 // neogenin // 9	Neo1	NM_008684	0.000860575	-1.24522
NR_029904 // Mir181b-2 // microRNA 181b-2 // --- // 723903	Mir181b-2	NR_029904	0.0476423	-1.24503
NM_022420 // Gprc5b // G protein-coupled receptor, family C, group 5, member B // 7 F3	Gprc5b	NM_022420	0.0113896	-1.24489
NM_011416 // Smarca2 // SWI/SNF related, matrix associated, actin dependent regulator o	Smarca2	NM_011416	0.018156	-1.24475
NM_019667 // Stam2 // signal transducing adaptor molecule (SH3 domain and ITAM motif) 2	Stam2	NM_019667	0.000561351	-1.24421
NM_134093 // Letmd1 // LETM1 domain containing 1 // 15 F1 // 68614 /// ENSMUST000000370	Letmd1	NM_134093	0.0260506	-1.24396
NM_001081080 // Phf3 // PHD finger protein 3 // 1 A5 // 213109 /// ENSMUST00000088310 /	Phf3	NM_001081080	0.00556435	-1.24395
NM_001145835 // Ralgds // ral guanine nucleotide dissociation stimulator // 2 A3 // 197	Ralgds	NM_001145835	0.0236195	-1.24367
NM_013587 // Lrpap1 // low density lipoprotein receptor-related protein associated prot	Lrpap1	NM_013587	0.0318823	-1.24366
L78788 // D17H6S56E-5 // DNA segment, Chr 17, human D6S56E 5 // 17 B1|17 19.0 cM // 110	D17H6S56E-5	L78788	0.00643258	-1.24361
NM_008584 // Meox2 // mesenchyme homeobox 2 // 12 A3|12 20.0 cM // 17286 /// ENSMUST000	Meox2	NM_008584	0.0115875	-1.24357
NM_008605 // Mmp12 // matrix metallopeptidase 12 // 9 A1|9 1.0 cM // 17381 /// ENSMUST0	Mmp12	NM_008605	0.0141405	-1.24355
NM_007426 // Angpt2 // angiopoietin 2 // 8 A1.3|8 9.0 cM // 11601 /// ENSMUST0000003384	Angpt2	NM_007426	0.0127571	-1.24315
NM_144794 // Tmem63a // transmembrane protein 63a // 1 H4 // 208795 /// ENSMUST00000027	Tmem63a	NM_144794	0.00250163	-1.2429
NM_028349 // Sass6 // spindle assembly 6 homolog (C. elegans) // 3 G2 // 72776 /// NM_0	Sass6	NM_028349	0.00640584	-1.24257
NM_009238 // Sox4 // SRY-box containing gene 4 // 13 A3-A5|13 20.0 cM // 20677 /// ENSM	Sox4	NM_009238	0.0390976	-1.24231
NM_175272 // Nav2 // neuron navigator 2 // 7 B3-B4 // 78286 /// NM_001111016 // Nav2 //	Nav2	NM_175272	0.00954054	-1.24226
NM_001163664 // Tnnt3 // troponin T3, skeletal, fast // 7 F5|7 69.0 cM // 21957 /// NM_	Tnnt3	NM_001163664	0.00335842	-1.24211
NM_001039482 // Klhl20 // kelch-like 20 (Drosophila) // 1 H2.1 // 226541 /// ENSMUST000	Klhl20	NM_001039482	0.000264564	-1.24204
NR_029658 // Mir106b // microRNA 106b // --- // 723925	Mir106b	NR_029658	0.0224714	-1.24204
NM_172393 // Aim1 // absent in melanoma 1 // 10 B2|10 29.0 cM // 11630 /// ENSMUST00000	Aim1	NM_172393	0.00254143	-1.24196
NM_009888 // Cfh // complement component factor h // 1 F|1 74.1 cM // 12628 /// ENSMUST	Cfh	NM_009888	0.000564112	-1.24176
NM_015767 // Ttpa // tocopherol (alpha) transfer protein // 4 A3|4 22.7 cM // 50500 ///	Ttpa	NM_015767	0.0322632	-1.24147
NM_007892 // E2f5 // E2F transcription factor 5 // 3 A1 // 13559 /// ENSMUST00000029069	E2f5	NM_007892	0.00911936	-1.24121
NM_008955 // Rhox6 // reproductive homeobox 6 // X A3.3 // 19202 /// ENSMUST00000006362	Rhox6	NM_008955	0.0248355	-1.24121
NM_001164503 // Akap11 // A kinase (PRKA) anchor protein 11 // 14 D3 // 219181 /// AK12	Akap11	NM_001164503	0.0285739	-1.24112
NM_153107 // Cpz // carboxypeptidase Z // 5 B3 // 242939 /// ENSMUST00000038676 // Cpz	Cpz	NM_153107	0.00628077	-1.24066
NM_025432 // Trappc2 // trafficking protein particle complex 2 // X F5 // 66226 /// ENS	Trappc2	NM_025432	0.025874	-1.24053
NM_001163643 // Map3k12 // mitogen-activated protein kinase kinase kinase 12 // 15 F3 /	Map3k12	NM_001163643	0.00661338	-1.24047
NM_178689 // Eno4 // enolase 4 // 19 D3 // 226265 /// ENSMUST00000054280 // Eno4 // eno	Eno4	NM_178689	0.0247234	-1.24014
NM_011445 // Sox6 // SRY-box containing gene 6 // 7 F1|7 55.0 cM // 20679 /// NM_001025	Sox6	NM_011445	0.0287935	-1.24004
NM_008778 // Pak3 // p21 protein (Cdc42/Rac)-activated kinase 3 // X F2 // 18481 /// EN	Pak3	NM_008778	0.0150226	-1.23935
NM_172398 // Akr1b10 // aldo-keto reductase family 1, member B10 (aldose reductase) //	Akr1b10	NM_172398	0.046037	-1.23929
NM_001164503 // Akap11 // A kinase (PRKA) anchor protein 11 // 14 D3 // 219181 /// ENSM	Akap11	NM_001164503	0.0238129	-1.23907
NM_028722 // Msl1 // male-specific lethal 1 homolog (Drosophila) // 11 D // 74026 /// B	Msl1	NM_028722	0.0157285	-1.23899
NM_173390 // Nhsl1 // NHS-like 1 // 10 A3|10 8.0 cM // 215819 /// NM_001163592 // Nhsl1	Nhsl1	NM_173390	0.0108091	-1.2384
NM_010601 // Kcnh3 // potassium voltage-gated channel, subfamily H (eag-related), membe	Kcnh3	NM_010601	0.0100837	-1.23839
NM_025817 // 1200009O22Rik // RIKEN cDNA 1200009O22 gene // 6 B3 // 66873 /// BC043099	1200009O22Rik	NM_025817	0.0183153	-1.23823
NM_007452 // Prdx3 // peroxiredoxin 3 // 19 D3|19 50.0 cM // 11757 /// ENSMUST000000259	Prdx3	NM_007452	0.00164869	-1.23771
NM_001024720 // Hmcn1 // hemicentin 1 // 1 G1 // 545370 /// ENSMUST00000074783 // Hmcn1	Hmcn1	NM_001024720	0.00639739	-1.23771
NM_134029 // Nt5m // 5',3'-nucleotidase, mitochondrial // 11 B // 103850 /// ENSMUST000	Nt5m	NM_134029	0.0204768	-1.23695
BC106181 // 3010003L21Rik // RIKEN cDNA 3010003L21 gene // 6 G3 // 109163	3010003L21Rik	BC106181	0.00576261	-1.23641
NM_009395 // Tnfaip1 // tumor necrosis factor, alpha-induced protein 1 (endothelial) //	Tnfaip1	NM_009395	0.000876347	-1.23637
NM_001083810 // Prr5l // proline rich 5 like // 2 E2 // 72446 /// NM_175181 // Prr5l //	Prr5l	NM_001083810	0.0408704	-1.23591
NR_033525 // Wiz // widely-interspaced zinc finger motifs // 17 B2 // 22404 /// NM_0117	Wiz	NR_033525	0.00106253	-1.23583
NM_001142918 // Tcf7l2 // transcription factor 7-like 2, T-cell specific, HMG-box // 19	Tcf7l2	NM_001142918	0.0452292	-1.23571
NM_001005510 // Syne2 // synaptic nuclear envelope 2 // 12 C3 // 319565 /// BC082586 //	Syne2	NM_001005510	0.0444474	-1.23562
NM_010763 // Man1a2 // mannosidase, alpha, class 1A, member 2 // 3 F2.2 // 17156 /// EN	Man1a2	NM_010763	0.00362607	-1.23547
NM_008997 // Rab11b // RAB11B, member RAS oncogene family // 17 B1|17 18.3 cM // 19326	Rab11b	NM_008997	0.000349586	-1.23537
NM_029094 // Pik3cb // phosphatidylinositol 3-kinase, catalytic, beta polypeptide // 9	Pik3cb	NM_029094	0.0010227	-1.23536
NM_028901 // Myo18b // myosin XVIIIb // 5 F // 74376	Myo18b	NM_028901	0.00469865	-1.23531
NM_011828 // Hs2st1 // heparan sulfate 2-O-sulfotransferase 1 // 3 H2 // 23908 /// ENSM	Hs2st1	NM_011828	0.00604368	-1.23527
NM_023041 // Pex19 // peroxisomal biogenesis factor 19 // 1 H3|1 93.6 cM // 19298 /// N	Pex19	NM_023041	0.0140474	-1.23504
NR_030275 // Mir503 // microRNA 503 // --- // 723879	Mir503	NR_030275	0.00521566	-1.23498
NM_009796 // Capn7 // calpain 7 // 14 B // 12339 /// ENSMUST00000022451 // Capn7 // cal	Capn7	NM_009796	0.000367532	-1.2349
NR_029548 // Mir134 // microRNA 134 // --- // 387152	Mir134	NR_029548	0.0493724	-1.23481
NM_007560 // Bmpr1b // bone morphogenetic protein receptor, type 1B // 3 H1 // 12167 //	Bmpr1b	NM_007560	0.00468895	-1.23476
NM_026351 // Ttc39d // tetratricopeptide repeat domain 39D // 17 E3 // 67737 /// ENSMUS	Ttc39d	NM_026351	0.0360676	-1.2344
NM_008511 // Lrmp // lymphoid-restricted membrane protein // 6 G3|6 71.0 cM // 16970 //	Lrmp	NM_008511	0.0135232	-1.23436
NM_033320 // Glce // glucuronyl C5-epimerase // 9 C-D // 93683 /// ENSMUST00000034785 /	Glce	NM_033320	0.00624702	-1.23433
NM_145469 // Nipal2 // NIPA-like domain containing 2 // 15 B3.1 // 223473 /// ENSMUST00	Nipal2	NM_145469	0.023802	-1.2342
NM_001113558 // Ucma // upper zone of growth plate and cartilage matrix associated // 2	Ucma	NM_001113558	0.0479504	-1.2337
NM_001163026 // Dnajc13 // DnaJ (Hsp40) homolog, subfamily C, member 13 // 9 F1 // 2355	Dnajc13	NM_001163026	0.0286467	-1.23353
NM_001012330 // Zfp238 // zinc finger protein 238 // 1 H3 // 30928 /// NM_013915 // Zfp	Zfp238	NM_001012330	0.00774168	-1.23325
NM_022017 // Trpv4 // transient receptor potential cation channel, subfamily V, member	Trpv4	NM_022017	0.0236882	-1.23316
NM_011847 // Dnajb6 // DnaJ (Hsp40) homolog, subfamily B, member 6 // 5 B1 // 23950 ///	Dnajb6	NM_011847	0.0267322	-1.23287
NM_010777 // Mbp // myelin basic protein // 18 E2-E4|18 55.0 cM // 17196 /// NM_0010252	Mbp	NM_010777	0.0111051	-1.23269
NM_029148 // Tmx4 // thioredoxin-related transmembrane protein 4 // 2 G1|2 77.0 cM // 5	Tmx4	NM_029148	0.0105088	-1.23236
NM_010680 // Lama3 // laminin, alpha 3 // 18 A|18 3.0 cM // 16774 /// ENSMUST0000009207	Lama3	NM_010680	0.00421264	-1.23233
NM_146250 // Gpr1 // G protein-coupled receptor 1 // 1 C2 // 241070 /// ENSMUST00000050	Gpr1	NM_146250	0.00223351	-1.23232
NM_172663 // Epc2 // enhancer of polycomb homolog 2 (Drosophila) // 2 C1.1|2 30.0 cM //	Epc2	NM_172663	0.00982122	-1.23201
NM_001081157 // Lmod3 // leiomodin 3 (fetal) // 6 D3 // 320502 /// ENSMUST00000095655 /	Lmod3	NM_001081157	0.0081952	-1.23171
NM_177644 // Rasal2 // RAS protein activator like 2 // 1 H1 // 226525 /// ENSMUST000000	Rasal2	NM_177644	0.0050582	-1.23159
NM_181075 // 2610524H06Rik // RIKEN cDNA 2610524H06 gene // 5 F // 330173 /// BC096574	2610524H06Rik	NM_181075	0.0112862	-1.23139
NM_007561 // Bmpr2 // bone morphogenic protein receptor, type II (serine/threonine kina	Bmpr2	NM_007561	0.00664934	-1.23137
NM_146699 // Olfr1445 // olfactory receptor 1445 // --- // 258694 /// ENSMUST0000004962	Olfr1445	NM_146699	0.0028848	-1.23117
NM_015740 // Bloc1s1 // biogenesis of lysosome-related organelles complex-1, subunit 1	Bloc1s1	NM_015740	0.0272905	-1.23108
NM_138944 // Pou4f2 // POU domain, class 4, transcription factor 2 // --- // 18997 ///	Pou4f2	NM_138944	0.00807232	-1.23104
NM_001145972 // Gpr114 // G protein-coupled receptor 114 // 8 D1 // 382045 /// NM_00103	Gpr114	NM_001145972	0.00504532	-1.23091
NM_001081315 // Brpf3 // bromodomain and PHD finger containing, 3 // 17 A3.3 // 268936	Brpf3	NM_001081315	0.000544155	-1.23068
NM_001163026 // Dnajc13 // DnaJ (Hsp40) homolog, subfamily C, member 13 // 9 F1 // 2355	Dnajc13	NM_001163026	0.033694	-1.23059
NM_054048 // Rcor2 // REST corepressor 2 // 19 A // 104383 /// ENSMUST00000113369 // Rc	Rcor2	NM_054048	0.0123242	-1.2303
NM_030153 // Naa35 // N(alpha)-acetyltransferase 35, NatC auxiliary subunit // 13 B3 //	Naa35	NM_030153	0.0020585	-1.23016
NM_138311 // H1foo // H1 histone family, member O, oocyte-specific // 6 E3 // 171506 //	H1foo	NM_138311	0.0274515	-1.23007
NM_015767 // Ttpa // tocopherol (alpha) transfer protein // 4 A3|4 22.7 cM // 50500 ///	Ttpa	NM_015767	0.00180452	-1.22986
NM_009179 // St3gal2 // ST3 beta-galactoside alpha-2,3-sialyltransferase 2 // 8 E1 // 2	St3gal2	NM_009179	0.000787976	-1.22982
NM_001163513 // Dlg5 // discs, large homolog 5 (Drosophila) // 14 A3 // 71228 /// NM_02	Dlg5	NM_001163513	0.00264885	-1.22979
NR_002855 // Igf2as // insulin-like growth factor 2, antisense // 7 F5|7 69.09 cM // 11	Igf2as	NR_002855	0.00309518	-1.22968
NM_030188 // Ttc30a1 // tetratricopeptide repeat domain 30A1 // --- // 78802 /// ENSMUS	Ttc30a1	NM_030188	0.0384934	-1.22966
NM_019969 // Plag1 // pleiomorphic adenoma gene 1 // 4 A1 // 56711 /// ENSMUST000000033	Plag1	NM_019969	0.0165709	-1.22958
NM_145418 // BC013529 // cDNA sequence BC013529 // 10 A1 // 215751 /// BC013529 // BC01	BC013529	NM_145418	0.00236055	-1.22918
NM_028807 // 1200009I06Rik // RIKEN cDNA 1200009I06 gene // 12 F2 // 74190 /// ENSMUST0	1200009I06Rik	NM_028807	0.0250248	-1.22916
NM_001122818 // Pnpla6 // patatin-like phospholipase domain containing 6 // 8 A1.1|8 1.	Pnpla6	NM_001122818	0.0348201	-1.22892
NM_001024720 // Hmcn1 // hemicentin 1 // 1 G1 // 545370 /// ENSMUST00000074783 // Hmcn1	Hmcn1	NM_001024720	0.0255535	-1.22884
NM_027773 // Fam57a // family with sequence similarity 57, member A // 11 B5 // 116972	Fam57a	NM_027773	0.0284161	-1.2284
NM_001135559 // Sos2 // son of sevenless homolog 2 (Drosophila) // 12 C3-D|12 30.0 cM /	Sos2	NM_001135559	0.000852329	-1.22815
NM_028658 // Klraq1 // KLRAQ motif containing 1 // 17 E4 // 73825 /// ENSMUST0000003855	Klraq1	NM_028658	0.00595989	-1.22786
NM_018886 // Lgals8 // lectin, galactose binding, soluble 8 // 13 A1|13 8.0 cM // 56048	Lgals8	NM_018886	0.0365569	-1.22772
NM_016667 // Sntb1 // syntrophin, basic 1 // 15 D1|15 33.2 cM // 20649 /// ENSMUST00000	Sntb1	NM_016667	0.0482082	-1.22753
ENSMUST00000069372 // E030030I06Rik // RIKEN cDNA E030030I06 gene // 10 A3 // 319887 //	E030030I06Rik	ENSMUST00000069372	0.034704	-1.22751
NM_008817 // Peg3 // paternally expressed 3 // 7 A2-B1|7 6.5 cM // 18616 /// ENSMUST000	Peg3	NM_008817	0.00234662	-1.22713
NM_016915 // Pla2g6 // phospholipase A2, group VI // 15 E1 // 53357 /// ENSMUST00000047	Pla2g6	NM_016915	0.00133958	-1.22706
NM_026130 // Srpr // signal recognition particle receptor ('docking protein') // 9 A5.3	Srpr	NM_026130	0.0191482	-1.22705
NM_011382 // Six4 // sine oculis-related homeobox 4 homolog (Drosophila) // 12 C3 // 20	Six4	NM_011382	0.0062944	-1.22656
ENSMUST00000110576 // LOC625240 // similar to D5Ertd577e protein // --- // 625240	LOC625240	ENSMUST00000110576	0.0364778	-1.22653
NM_029342 // Nhej1 // nonhomologous end-joining factor 1 // 1 C3 // 75570 /// ENSMUST00	Nhej1	NM_029342	0.0310951	-1.22651
NM_010748 // Lyst // lysosomal trafficking regulator // 13 A1|13 7.0 cM // 17101 /// EN	Lyst	NM_010748	0.0424907	-1.22635
NM_183262 // Stk35 // serine/threonine kinase 35 // 2 F1 // 67333 /// NM_001038635 // S	Stk35	NM_183262	0.00136169	-1.22623
NM_010928 // Notch2 // Notch gene homolog 2 (Drosophila) // 3 F2.2|3 45.6 cM // 18129 /	Notch2	NM_010928	0.0121086	-1.22589
NM_013799 // Ate1 // arginyltransferase 1 // 7 F3 // 11907 /// NM_001136054 // Ate1 //	Ate1	NM_013799	0.000984499	-1.22553
NM_175153 // 2010321M09Rik // RIKEN cDNA 2010321M09 gene // 9 C // 69882 /// NM_0010776	2010321M09Rik	NM_175153	0.0197183	-1.22534
NM_007710 // Ckm // creatine kinase, muscle // 7 A3|7 4.5 cM // 12715 /// ENSMUST000000	Ckm	NM_007710	0.0307516	-1.22529
BC117078 // 4933402J07Rik // RIKEN cDNA 4933402J07 gene // 8 C3 // 330820 /// NM_177901	4933402J07Rik	BC117078	0.0186215	-1.2252
NM_013735 // Trp53bp1 // transformation related protein 53 binding protein 1 // 2 E5 //	Trp53bp1	NM_013735	0.0244169	-1.22514
NM_008626 // Mrc2 // mannose receptor, C type 2 // 11 E1 // 17534 /// ENSMUST0000010033	Mrc2	NM_008626	0.0241801	-1.22506
NM_027788 // Fam83c // family with sequence similarity 83, member C // 2 H2 // 71405 //	Fam83c	NM_027788	0.026972	-1.22497
NM_010076 // Drd1a // dopamine receptor D1A // 13 B1|13 32.0 cM // 13488 /// ENSMUST000	Drd1a	NM_010076	0.00642623	-1.22486
XM_909470 // Gm13194 // predicted gene 13194 // 2 A1 // 381346	Gm13194	XM_909470	0.0321421	-1.22472
NM_001150749 // Rdh7 // retinol dehydrogenase 7 // 10 D3 // 54150 /// NM_017473 // Rdh7	Rdh7	NM_001150749	0.00291086	-1.22465
NM_001177721 // Madd // MAP-kinase activating death domain // 2 E1 // 228355 /// NM_001	Madd	NM_001177721	0.0431159	-1.22435
NM_009873 // Cdk6 // cyclin-dependent kinase 6 // 5 A2-A3|5 1.0 cM // 12571 /// ENSMUST	Cdk6	NM_009873	0.00968402	-1.22428
NM_207675 // Cadm1 // cell adhesion molecule 1 // 9 B-C // 54725 /// NM_018770 // Cadm1	Cadm1	NM_207675	0.039214	-1.22427
NM_025990 // 2310021H06Rik // RIKEN cDNA 2310021H06 gene // 2 H1 // 67135 /// ENSMUST00	2310021H06Rik	NM_025990	4.28164e-06	-1.22408
NM_172338 // Dnajc16 // DnaJ (Hsp40) homolog, subfamily C, member 16 // 4 E1 // 214063	Dnajc16	NM_172338	0.00621284	-1.22385
NM_009133 // Stmn3 // stathmin-like 3 // 2 H4 // 20262 /// ENSMUST00000103045 // Stmn3	Stmn3	NM_009133	0.00912403	-1.22375
NM_144858 // Dus3l // dihydrouridine synthase 3-like (S. cerevisiae) // 17 D // 224907	Dus3l	NM_144858	0.0409515	-1.22371
NM_001164362 // Cep55 // centrosomal protein 55 // 19 C3 // 74107 /// NM_028760 // Cep5	Cep55	NM_001164362	0.000158156	-1.22354
NM_001160139 // Kcnq5 // potassium voltage-gated channel, subfamily Q, member 5 // 1 A5	Kcnq5	NM_001160139	0.0503801	-1.22338
BC151018 // A430107O13Rik // RIKEN cDNA A430107O13 gene // 6 A3.1 // 214642 /// NM_0010	A430107O13Rik	BC151018	0.0360105	-1.22322
NM_001024720 // Hmcn1 // hemicentin 1 // 1 G1 // 545370 /// ENSMUST00000074783 // Hmcn1	Hmcn1	NM_001024720	0.00906724	-1.2231
NM_021510 // Hnrnph1 // heterogeneous nuclear ribonucleoprotein H1 // 11 B1.2 // 59013	Hnrnph1	NM_021510	0.0134989	-1.22301
NM_001014973 // Snx13 // sorting nexin 13 // 12 A3 // 217463 /// ENSMUST00000048519 //	Snx13	NM_001014973	0.0189375	-1.22285
NM_144810 // Klhdc8a // kelch domain containing 8A // 1 E4 // 213417 /// ENSMUST0000004	Klhdc8a	NM_144810	0.0381126	-1.22272
NM_001012305 // Slc39a12 // solute carrier family 39 (zinc transporter), member 12 // 2	Slc39a12	NM_001012305	0.00277097	-1.22271
NM_030732 // Tbl1xr1 // transducin (beta)-like 1X-linked receptor 1 // 3 A3 // 81004 //	Tbl1xr1	NM_030732	0.0175822	-1.22255
NM_008714 // Notch1 // Notch gene homolog 1 (Drosophila) // 2 A3|2 15.0 cM // 18128 ///	Notch1	NM_008714	0.0304824	-1.22251
NM_001080930 // Atxn1l // ataxin 1-like // 8 D3|8 53.0 cM // 52335 /// ENSMUST000000931	Atxn1l	NM_001080930	0.0119534	-1.22247
NM_030598 // Rcan2 // regulator of calcineurin 2 // 17 C|17 22.0 cM // 53901 /// NM_207	Rcan2	NM_030598	0.0338704	-1.22241
NM_001024945 // Qsox1 // quiescin Q6 sulfhydryl oxidase 1 // 1 G3 // 104009 /// NM_0232	Qsox1	NM_001024945	0.0283708	-1.22235
NM_009233 // Sox1 // SRY-box containing gene 1 // 8 A1-A2|8 4.0 cM // 20664 /// ENSMUST	Sox1	NM_009233	0.0478533	-1.22207
NM_177352 // Gk5 // glycerol kinase 5 (putative) // 9 E3.3 // 235533 /// ENSMUST0000012	Gk5	NM_177352	0.00625903	-1.22191
NM_130858 // Nxph3 // neurexophilin 3 // 11 C // 104079 /// ENSMUST00000058866 // Nxph3	Nxph3	NM_130858	0.0366139	-1.22161
NM_172737 // Shisa7 // shisa homolog 7 (Xenopus laevis) // 7 A1 // 232813 /// ENSMUST00	Shisa7	NM_172737	0.0417706	-1.22154
NM_001038993 // Rnf38 // ring finger protein 38 // 4 B1 // 73469 /// NM_175201 // Rnf38	Rnf38	NM_001038993	0.00483964	-1.22134
NM_009068 // Ripk1 // receptor (TNFRSF)-interacting serine-threonine kinase 1 // 13 A3.	Ripk1	NM_009068	0.0223097	-1.22115
NM_028248 // Tmem87b // transmembrane protein 87B // 2 F3 // 72477 /// ENSMUST000001103	Tmem87b	NM_028248	0.0124277	-1.22062
NM_178680 // Unc45b // unc-45 homolog B (C. elegans) // 11 C // 217012 /// ENSMUST00000	Unc45b	NM_178680	0.0505945	-1.22023
NM_053214 // Myo1f // myosin IF // 17 B-C|17 17.5 cM // 17916 /// ENSMUST00000087605 //	Myo1f	NM_053214	0.0333537	-1.22016
NM_015740 // Bloc1s1 // biogenesis of lysosome-related organelles complex-1, subunit 1	Bloc1s1	NM_015740	0.0210219	-1.22008
NM_001037321 // Fbxo40 // F-box protein 40 // 16 B3 // 207215 /// ENSMUST00000075869 //	Fbxo40	NM_001037321	0.0253137	-1.21989
NM_026057 // Zfp422 // zinc finger protein 422 // 6 E3 // 67255 /// ENSMUST00000079749	Zfp422	NM_026057	0.0278219	-1.21966
NR_029602 // Mir30e // microRNA 30e // --- // 723836	Mir30e	NR_029602	0.0108418	-1.21954
NM_177185 // Ubn2 // ubinuclein 2 // 6 B1 // 320538 /// ENSMUST00000039127 // Ubn2 // u	Ubn2	NM_177185	0.00884314	-1.21945
NM_145506 // Epb4.1l5 // erythrocyte protein band 4.1-like 5 // 1 E2.3 // 226352 /// NM	Epb4.1l5	NM_145506	0.0102594	-1.21931
NM_001039114 // Acsbg2 // acyl-CoA synthetase bubblegum family member 2 // 17 D // 3288	Acsbg2	NM_001039114	0.0181984	-1.21924
NM_001163026 // Dnajc13 // DnaJ (Hsp40) homolog, subfamily C, member 13 // 9 F1 // 2355	Dnajc13	NM_001163026	0.033484	-1.21915
NM_177561 // Usp46 // ubiquitin specific peptidase 46 // 5 C3.3 // 69727 /// ENSMUST000	Usp46	NM_177561	0.0299009	-1.21886
NM_178642 // Ano1 // anoctamin 1, calcium activated chloride channel // 7 F5 // 101772	Ano1	NM_178642	0.0035534	-1.21852
NM_001085355 // Arid1b // AT rich interactive domain 1B (SWI-like) // 17 A1 // 239985 /	Arid1b	NM_001085355	0.00164107	-1.21832
NM_010924 // Nnmt // nicotinamide N-methyltransferase // 9 A5.3|9 29.0 cM // 18113 ///	Nnmt	NM_010924	0.0339098	-1.21827
NM_029098 // Lmbr1l // limb region 1 like // 15 F1|15 60.4 cM // 74775 /// ENSMUST00000	Lmbr1l	NM_029098	0.00319804	-1.2182
NM_028525 // Prss52 // protease, serine, 52 // 14 D1 // 73382 /// ENSMUST00000022537 //	Prss52	NM_028525	0.00808678	-1.21805
NM_153178 // Eif2c2 // eukaryotic translation initiation factor 2C, 2 // 15 D3 // 23952	Eif2c2	NM_153178	0.0135152	-1.21792
NM_019770 // Tmed2 // transmembrane emp24 domain trafficking protein 2 // 5 F // 56334	Tmed2	NM_019770	0.00592606	-1.21775
NM_019778 // Zbtb20 // zinc finger and BTB domain containing 20 // 16 B4|16 28.9 cM //	Zbtb20	NM_019778	0.0160663	-1.21773
NM_177338 // Hmbox1 // homeobox containing 1 // 14 D1 // 219150 /// ENSMUST00000067843	Hmbox1	NM_177338	0.00382303	-1.21766
NM_009735 // B2m // beta-2 microglobulin // 2 F1-F3|2 69.0 cM // 12010 /// ENSMUST00000	B2m	NM_009735	0.0410283	-1.2173
NM_001048176 // Cerkl // ceramide kinase-like // 2 C3 // 228094 /// NM_010576 // Itga4	Cerkl	NM_001048176	0.0365211	-1.21715
M86736 // Grn // granulin // 11 D|11 60.0 cM // 14824 /// M86736 // Grn // granulin //	Grn	M86736	0.0167689	-1.21704
NM_008124 // Gjb1 // gap junction protein, beta 1 // X D-F4|X 41.0 cM // 14618 /// ENSM	Gjb1	NM_008124	0.0336521	-1.21698
NM_024495 // Car13 // carbonic anhydrase 13 // 3 A2 // 71934 /// ENSMUST00000029071 //	Car13	NM_024495	0.0319311	-1.21694
NM_146062 // Pphln1 // periphilin 1 // 15 E3 // 223828 /// NM_175363 // Pphln1 // perip	Pphln1	NM_146062	0.00653812	-1.21687
NM_172787 // L3mbtl3 // l(3)mbt-like 3 (Drosophila) // 10 A4 // 237339 /// ENSMUST00000	L3mbtl3	NM_172787	0.0112783	-1.21681
NM_018750 // Rassf5 // Ras association (RalGDS/AF-6) domain family member 5 // 1 E4|1 6	Rassf5	NM_018750	0.00973139	-1.21677
NM_001177390 // Gm6985 // predicted gene 6985 // X C3 // 629581	Gm6985	NM_001177390	0.00535659	-1.21676
NM_177387 // Ust // uronyl-2-sulfotransferase // 10 A1 // 338362 /// ENSMUST00000061601	Ust	NM_177387	0.0438939	-1.21623
NM_153679 // Cpt1c // carnitine palmitoyltransferase 1c // 7 B2 // 78070 /// ENSMUST000	Cpt1c	NM_153679	0.00834399	-1.21582
NM_020270 // Scamp5 // secretory carrier membrane protein 5 // 9 B // 56807 /// ENSMUST	Scamp5	NM_020270	0.025583	-1.21543
NM_001033268 // Fam120a // family with sequence similarity 120, member A // 13 A5 // 21	Fam120a	NM_001033268	0.00135818	-1.21534
NM_011636 // Plscr1 // phospholipid scramblase 1 // 9 E3.3 // 22038 /// ENSMUST00000093	Plscr1	NM_011636	0.027197	-1.2153
NM_010916 // Nhlh1 // nescient helix loop helix 1 // 1 H3|1 93.4 cM // 18071 /// ENSMUS	Nhlh1	NM_010916	0.0385676	-1.21521
BC138236 // 4922501L14Rik // RIKEN cDNA 4922501L14 gene // 3 H4 // 209601 /// NM_175176	4922501L14Rik	BC138236	0.00169428	-1.21459
NM_207258 // Fam71f1 // family with sequence similarity 71, member F1 // 6 A3.3 // 3302	Fam71f1	NM_207258	0.0343923	-1.2145
NM_017406 // Atf6b // activating transcription factor 6 beta // 17 B1|17 18.85 cM // 12	Atf6b	NM_017406	0.0377746	-1.21446
NM_001162943 // Dchs1 // dachsous 1 (Drosophila) // 7 E3 // 233651 /// ENSMUST000000784	Dchs1	NM_001162943	0.0117169	-1.21432
NM_174848 // Crybg3 // beta-gamma crystallin domain containing 3 // 16 C1.3 // 224273 /	Crybg3	NM_174848	0.0374927	-1.21409
NM_001164099 // Add3 // adducin 3 (gamma) // 19 D2|19 47.0 cM // 27360 /// NM_013758 //	Add3	NM_001164099	0.0224387	-1.21374
NM_175473 // Fras1 // Fraser syndrome 1 homolog (human) // 5 E3 // 231470 /// ENSMUST00	Fras1	NM_175473	0.029112	-1.21368
NM_153054 // Slc18a1 // solute carrier family 18 (vesicular monoamine), member 1 // 8 B	Slc18a1	NM_153054	0.0440577	-1.2134
NM_001081204 // B3galtl // beta 1,3-galactosyltransferase-like // 5 G3 // 381694 /// EN	B3galtl	NM_001081204	0.0133415	-1.21333
NM_013796 // Nagpa // N-acetylglucosamine-1-phosphodiester alpha-N-acetylglucosaminidas	Nagpa	NM_013796	0.0490028	-1.213
XM_994395 // Gm4990 // predicted gene 4990 // X C3 // 245516	Gm4990	XM_994395	0.0209294	-1.21297
NR_030523 // Mir652 // microRNA 652 // --- // 723976	Mir652	NR_030523	0.0151712	-1.21285
NM_001029850 // Magi1 // membrane associated guanylate kinase, WW and PDZ domain contai	Magi1	NM_001029850	0.0489546	-1.21276
BC066161 // 9030617O03Rik // RIKEN cDNA 9030617O03 gene // 12 E // 217830 /// BC021385	9030617O03Rik	BC066161	0.00390343	-1.21255
NM_027213 // Med6 // mediator of RNA polymerase II transcription, subunit 6 homolog (ye	Med6	NM_027213	0.0140144	-1.21238
NM_181409 // Mtmr11 // myotubularin related protein 11 // 3 F2.1 // 194126 /// ENSMUST0	Mtmr11	NM_181409	0.00785339	-1.21208
NM_019819 // Dusp14 // dual specificity phosphatase 14 // 11 C|11 48.0 cM // 56405 ///	Dusp14	NM_019819	0.0352025	-1.21202
NM_001114312 // 4930506M07Rik // RIKEN cDNA 4930506M07 gene // 19 D3 // 71653 /// NM_17	4930506M07Rik	NM_001114312	0.025689	-1.21198
NM_001122676 // Zcchc2 // zinc finger, CCHC domain containing 2 // 1 E2.1 // 227449 ///	Zcchc2	NM_001122676	0.0384782	-1.2119
XR_032597 // Gm5213 // ferritin light chain 1 pseudogene // 15 B3.1|15 // 382986	Gm5213	XR_032597	0.00587595	-1.21184
NM_022422 // Gng13 // guanine nucleotide binding protein (G protein), gamma 13 // 17 A3	Gng13	NM_022422	0.0331473	-1.21157
NM_019574 // Patz1 // POZ (BTB) and AT hook containing zinc finger 1 // 11 A1 // 56218	Patz1	NM_019574	0.00762989	-1.2115
NM_018779 // Pde3a // phosphodiesterase 3A, cGMP inhibited // 6 G1 // 54611 /// ENSMUST	Pde3a	NM_018779	0.0122532	-1.21149
NM_029270 // Arhgap24 // Rho GTPase activating protein 24 // 5 E4 // 231532 /// NM_1461	Arhgap24	NM_029270	0.0133895	-1.21128
ENSMUST00000073406 // BC048679 // cDNA sequence BC048679 // 7 D3 // 210321 /// BC048679	BC048679	ENSMUST00000073406	0.0304219	-1.21104
NM_001166644 // Zfp651 // zinc finger protein 651 // 9 F4 // 270210	Zfp651	NM_001166644	0.00873206	-1.21102
NM_027307 // Golm1 // golgi membrane protein 1 // 13 B3 // 105348 /// NM_001035122 // G	Golm1	NM_027307	0.0472083	-1.211
NM_011923 // Angptl2 // angiopoietin-like 2 // 2 B // 26360 /// ENSMUST00000004208 // A	Angptl2	NM_011923	0.0097599	-1.21091
NM_011749 // Zfp148 // zinc finger protein 148 // 16 B3|16 21.1 cM // 22661 /// ENSMUST	Zfp148	NM_011749	0.0020094	-1.2109
NM_011365 // Itsn2 // intersectin 2 // 12 A1.1 // 20403 /// ENSMUST00000062580 // Itsn2	Itsn2	NM_011365	0.0169952	-1.21048
NM_001033253 // Plekhg1 // pleckstrin homology domain containing, family G (with RhoGef	Plekhg1	NM_001033253	0.0393132	-1.21027
NM_001008973 // Tmem232 // transmembrane protein 232 // 17 E1.1 // 381107 /// ENSMUST00	Tmem232	NM_001008973	0.0260244	-1.21021
NM_009826 // Rb1cc1 // RB1-inducible coiled-coil 1 // 1 A2 // 12421 /// ENSMUST00000027	Rb1cc1	NM_009826	0.0454882	-1.20964
NM_178620 // Mfsd11 // major facilitator superfamily domain containing 11 // 11 E2 // 6	Mfsd11	NM_178620	0.0503361	-1.20952
NM_001001144 // Scap // SREBF chaperone // 9 F2 // 235623 /// NM_001103162 // Scap // S	Scap	NM_001001144	0.00885257	-1.20946
NM_008064 // Gaa // glucosidase, alpha, acid // 11 D-E|11 74.0 cM // 14387 /// NM_00115	Gaa	NM_008064	0.0164981	-1.20931
NM_001024720 // Hmcn1 // hemicentin 1 // 1 G1 // 545370 /// ENSMUST00000074783 // Hmcn1	Hmcn1	NM_001024720	0.00954141	-1.20913
NM_198660 // E230008N13Rik // RIKEN cDNA E230008N13 gene // 4 B1 // 381522	E230008N13Rik	NM_198660	0.0164866	-1.20879
NM_001081028 // Sipa1l3 // signal-induced proliferation-associated 1 like 3 // 7 B1 //	Sipa1l3	NM_001081028	0.0010779	-1.20862
NM_009687 // Apex1 // apurinic/apyrimidinic endonuclease 1 // 14 C3|14 18.5 cM // 11792	Apex1	NM_009687	0.0252869	-1.20859
NM_028922 // Ppapdc2 // phosphatidic acid phosphatase type 2 domain containing 2 // 19	Ppapdc2	NM_028922	0.0212991	-1.2084
ENSMUST00000074390 // Hmcn2 // hemicentin 2 // 2 B // 665700 /// ENSMUST00000113532 //	Hmcn2	ENSMUST00000074390	0.0183302	-1.20833
NM_183138 // Tet3 // tet oncogene family member 3 // 6 C3 // 194388 /// ENSMUST00000056	Tet3	NM_183138	0.048416	-1.20814
NM_173437 // Nav1 // neuron navigator 1 // 1 E4 // 215690 /// ENSMUST00000040599 // Nav	Nav1	NM_173437	0.0110707	-1.208
NM_011882 // Rnasel // ribonuclease L (2', 5'-oligoisoadenylate synthetase-dependent) /	Rnasel	NM_011882	0.0194043	-1.20798
NM_010137 // Epas1 // endothelial PAS domain protein 1 // 17 E4 // 13819 /// ENSMUST000	Epas1	NM_010137	0.0150848	-1.20769
NM_177030 // Dock6 // dedicator of cytokinesis 6 // 9 A3 // 319899 /// ENSMUST000000347	Dock6	NM_177030	0.00196285	-1.20759
NM_029619 // Msrb2 // methionine sulfoxide reductase B2 // 2 A2 // 76467 /// ENSMUST000	Msrb2	NM_029619	0.0328141	-1.20759
NM_008866 // Lypla1 // lysophospholipase 1 // 1 A1 // 18777 /// ENSMUST00000027036 // L	Lypla1	NM_008866	0.00483516	-1.20757
NM_027924 // Pdgfd // platelet-derived growth factor, D polypeptide // 9 A1 // 71785 //	Pdgfd	NM_027924	0.0122592	-1.20745
NM_009601 // Chrnb1 // cholinergic receptor, nicotinic, beta polypeptide 1 (muscle) //	Chrnb1	NM_009601	0.0193342	-1.20715
NM_026057 // Zfp422 // zinc finger protein 422 // 6 E3 // 67255 /// ENSMUST00000079749	Zfp422	NM_026057	0.000190015	-1.20705
ENSMUST00000070225 // A230051N06Rik // RIKEN cDNA A230051N06 gene // 17 D // 320593	A230051N06Rik	ENSMUST00000070225	0.0191774	-1.20666
NM_001093775 // Myt1l // myelin transcription factor 1-like // 12 A2|12 14.0 cM // 1793	Myt1l	NM_001093775	0.00363832	-1.20638
NM_026730 // Gpihbp1 // GPI-anchored HDL-binding protein 1 // 15 E1 // 68453 /// ENSMUS	Gpihbp1	NM_026730	0.0408792	-1.20622
NM_144807 // Chpt1 // choline phosphotransferase 1 // 10 C1 // 212862 /// NM_001146690	Chpt1	NM_144807	0.00240486	-1.20611
NM_001037809 // Cdh3 // cadherin 3 // 8 D3|8 53.3 cM // 12560 /// NM_007665 // Cdh3 //	Cdh3	NM_001037809	0.0293833	-1.20598
NM_001003934 // Rtn3 // reticulon 3 // 19 A // 20168 /// NM_001003933 // Rtn3 // reticu	Rtn3	NM_001003934	9.09949e-05	-1.20597
NM_001081235 // Mn1 // meningioma 1 // 5 F // 433938 /// ENSMUST00000094463 // Mn1 // m	Mn1	NM_001081235	0.0041973	-1.20597
NM_009335 // Tcfap2c // transcription factor AP-2, gamma // 2 H3-H4 // 21420 /// NM_001	Tcfap2c	NM_009335	0.0349401	-1.20591
NM_028086 // Mospd4 // motile sperm domain containing 4 // 18 C // 72076 /// ENSMUST000	Mospd4	NM_028086	0.0367981	-1.20589
NM_001039080 // Rbms2 // RNA binding motif, single stranded interacting protein 2 // 10	Rbms2	NM_001039080	0.00787725	-1.20586
NM_001013762 // Gm4952 // predicted gene 4952 // 19 A|19 // 240549 /// NM_001167907 //	Gm4952	NM_001013762	0.00181663	-1.20578
NM_001167906 // Cd101 // CD101 antigen // 3 F2.2 // 630146 /// NM_001099332 // Cd101 //	Cd101	NM_001167906	0.0389411	-1.20578
NM_007382 // Acadm // acyl-Coenzyme A dehydrogenase, medium chain // 3 H3|3 73.6 cM //	Acadm	NM_007382	0.0356661	-1.2053
NM_029721 // Snx27 // sorting nexin family member 27 // 3 F2 // 76742 /// NM_001082484	Snx27	NM_029721	0.00373312	-1.20515
NM_172992 // Phtf2 // putative homeodomain transcription factor 2 // 5 A3 // 68770 ///	Phtf2	NM_172992	0.00099389	-1.2051
NM_172734 // Stk38l // serine/threonine kinase 38 like // 6 G3 // 232533 /// ENSMUST000	Stk38l	NM_172734	0.0100292	-1.20506
NM_207109 // Astn2 // astrotactin 2 // --- // 56079 /// NM_019514 // Astn2 // astrotact	Astn2	NM_207109	0.0338733	-1.20497
NM_194340 // C330019G07Rik // RIKEN cDNA C330019G07 gene // 5 B1 // 215476 /// ENSMUST0	C330019G07Rik	NM_194340	0.00078728	-1.20492
NM_001037098 // Nacc2 // nucleus accumbens associated 2, BEN and BTB (POZ) domain conta	Nacc2	NM_001037098	0.0109806	-1.20486
XR_031351 // Gm6032 // predicted gene 6032 // 16 C3.3 // 547311 /// XR_005070 // LOC677	Gm6032	XR_031351	0.0142167	-1.20486
NM_172605 // Tdrd3 // tudor domain containing 3 // 14 E1 // 219249 /// BC005670 // Tdrd	Tdrd3	NM_172605	0.0227506	-1.20469
NM_015804 // Atp11a // ATPase, class VI, type 11A // 8 A2 // 50770 /// ENSMUST000000912	Atp11a	NM_015804	0.00463424	-1.20467
NM_181401 // Tmem64 // transmembrane protein 64 // 4 A2 // 100201 /// ENSMUST0000006268	Tmem64	NM_181401	0.00213811	-1.20443
ENSMUST00000099243 // LOC624931 // similar to D5Ertd577e protein // --- // 624931 /// E	LOC624931	ENSMUST00000099243	0.000997569	-1.20426
NM_019747 // Zfp113 // zinc finger protein 113 // 5 G1 // 56314 /// ENSMUST00000049393	Zfp113	NM_019747	0.015042	-1.20422
NM_007729 // Col11a1 // collagen, type XI, alpha 1 // 3 F3|3 53.1 cM // 12814 /// ENSMU	Col11a1	NM_007729	0.00934059	-1.20417
NM_177411 // Rab5b // RAB5B, member RAS oncogene family // 10 D3 // 19344 /// ENSMUST00	Rab5b	NM_177411	0.045129	-1.20414
NM_011998 // Chst4 // carbohydrate (chondroitin 6/keratan) sulfotransferase 4 // --- //	Chst4	NM_011998	0.0107275	-1.20406
NM_019460 // Sfmbt1 // Scm-like with four mbt domains 1 // 14 B|14 10.5 cM // 54650 ///	Sfmbt1	NM_019460	0.0256896	-1.20369
NM_007962 // Mpzl2 // myelin protein zero-like 2 // 9 A5.2|9 26.0 cM // 14012 /// ENSMU	Mpzl2	NM_007962	0.0228743	-1.20337
NM_001024720 // Hmcn1 // hemicentin 1 // 1 G1 // 545370 /// ENSMUST00000074783 // Hmcn1	Hmcn1	NM_001024720	0.0318449	-1.20301
NM_206974 // Kcnrg // potassium channel regulator // 14 D1 // 328424 /// NM_001039105 /	Kcnrg	NM_206974	0.0280959	-1.2028
NM_011199 // Pth1r // parathyroid hormone 1 receptor // 9 F|9 58.0 cM // 19228 /// NM_0	Pth1r	NM_011199	0.0384346	-1.20279
NM_001011790 // Olfr1382 // olfactory receptor 1382 // 11 B1.2 // 257971 /// ENSMUST000	Olfr1382	NM_001011790	0.00747513	-1.20266
NM_011868 // Peci // peroxisomal delta3, delta2-enoyl-Coenzyme A isomerase // 13 A4 //	Peci	NM_011868	0.010054	-1.20256
NM_021462 // Mknk2 // MAP kinase-interacting serine/threonine kinase 2 // 10 C1 // 1734	Mknk2	NM_021462	0.000972065	-1.20251
NM_198102 // Tra2a // transformer 2 alpha homolog (Drosophila) // 6 B2.3 // 101214 ///	Tra2a	NM_198102	0.0411533	-1.20201
NM_133746 // Calhm2 // calcium homeostasis modulator 2 // 19 C3 // 72691 /// ENSMUST000	Calhm2	NM_133746	0.0198085	-1.20185
NM_001081644 // Gm428 // predicted gene 428 // 4 C3 // 242502 /// NM_001177578 // Gm138	Gm428	NM_001081644	0.011533	-1.20178
NM_001159634 // Bat2l // HLA-B associated transcript 2-like // 2 B // 227723 /// NM_172	Bat2l	NM_001159634	0.00295529	-1.20168
NM_178279 // Pxk // PX domain containing serine/threonine kinase // 14 A1 // 218699 ///	Pxk	NM_178279	0.0170606	-1.20158
NM_001013380 // Dync1li2 // dynein, cytoplasmic 1 light intermediate chain 2 // 8 D3|8	Dync1li2	NM_001013380	0.000791034	-1.20156
NM_013813 // Epb4.1l3 // erythrocyte protein band 4.1-like 3 // 17 E1.3|17 42.5 cM // 1	Epb4.1l3	NM_013813	0.0203957	-1.20148
NM_021453 // Pga5 // pepsinogen 5, group I // --- // 58803 /// ENSMUST00000025647 // Pg	Pga5	NM_021453	0.00998296	-1.20135
NM_147108 // Olfr979 // olfactory receptor 979 // --- // 259112 /// ENSMUST00000080835	Olfr979	NM_147108	0.00144611	-1.20132
NM_011711 // Fmnl3 // formin-like 3 // 15 F3 // 22379 /// ENSMUST00000088233 // Fmnl3 /	Fmnl3	NM_011711	0.0144063	-1.20129
NM_133648 // Slc12a6 // solute carrier family 12, member 6 // 2 E3 // 107723 /// NM_133	Slc12a6	NM_133648	0.0209283	-1.20117
NM_146047 // Clptm1l // CLPTM1-like // 13 C1 // 218335 /// ENSMUST00000022102 // Clptm1	Clptm1l	NM_146047	0.0183019	-1.20098
NM_010612 // Kdr // kinase insert domain protein receptor // 5 C3.3|5 42.0 cM // 16542	Kdr	NM_010612	0.00938113	-1.20083
NM_008555 // Masp1 // mannan-binding lectin serine peptidase 1 // 16 B2-B3 // 17174 ///	Masp1	NM_008555	0.0435586	-1.20062
NM_026191 // Dhx40 // DEAH (Asp-Glu-Ala-His) box polypeptide 40 // 11 C // 67487 /// EN	Dhx40	NM_026191	0.00752066	-1.20044
