# Supplementary material for: MicroRNAs Regulate Ca2+ Homeostasis in Murine Embryonic Stem Cells
Source: Cells. 2023 Jul 28;12(15):1957. doi: 10.3390/cells12151957 (PMC10417630; doi:10.3390/cells12151957)
Supplement: Supplementary file 1 [file cells-12-01957-s001.zip › Table S2 DAVID analysis sorted.xlsx]

## Sheet: Sheet1
Table S2. DAVID analysis showing regulatory pathways that are disrupted in Dicer-/- ESCs. Below is the list of specific genes in each of the Ca2+ regulation categories.
Sublist	Category	Term	Term category	RT	Genes	Count	%	P-Value	Fold Enrichment	Benjamini
1	GOTERM_BP_DIRECT	lung alveolus development	organogenesis	RT		11	1.2	6.2e-05	4.9	0.026
4	GOTERM_BP_DIRECT	ureteric bud development	organogenesis	RT		9	1	0.0012	4.2	0.18
5	GOTERM_BP_DIRECT	spleen development	organogenesis	RT		8	0.9	0.0041	3.9	0.29
6	GOTERM_BP_DIRECT	heart looping	organogenesis	RT		10	1.1	0.0017	3.6	0.18
7	GOTERM_BP_DIRECT	negative regulation of osteoblast differentiation	organogenesis	RT		9	1	0.0033	3.6	0.27
10	GOTERM_BP_DIRECT	bone development	organogenesis	RT		8	0.9	0.01	3.3	0.51
14	GOTERM_BP_DIRECT	central nervous system development	organogenesis	RT		13	1.4	0.00073	3.2	0.14
16	GOTERM_BP_DIRECT	embryonic limb morphogenesis	organogenesis	RT		9	1	0.0075	3.1	0.44
20	GOTERM_BP_DIRECT	inner ear development	organogenesis	RT		9	1	0.011	3	0.53
23	GOTERM_BP_DIRECT	lung development	organogenesis	RT		16	1.7	0.00056	2.8	0.13
25	GOTERM_BP_DIRECT	liver development	organogenesis	RT		14	1.5	0.0015	2.8	0.18
27	GOTERM_BP_DIRECT	skeletal system development	organogenesis	RT		13	1.4	0.003	2.7	0.26
28	GOTERM_BP_DIRECT	organ morphogenesis	organogenesis	RT		13	1.4	0.0035	2.7	0.28
29	GOTERM_BP_DIRECT	positive regulation of osteoblast differentiation	organogenesis	RT		8	0.9	0.034	2.6	0.83
30	GOTERM_BP_DIRECT	organ regeneration	organogenesis	RT		8	0.9	0.034	2.6	0.83
35	GOTERM_BP_DIRECT	cartilage development	organogenesis	RT		9	1	0.03	2.4	0.8
39	GOTERM_BP_DIRECT	palate development	organogenesis	RT		9	1	0.036	2.4	0.84
40	GOTERM_BP_DIRECT	post-embryonic development	organogenesis	RT		12	1.3	0.014	2.3	0.59
41	GOTERM_BP_DIRECT	kidney development	organogenesis	RT		14	1.5	0.0076	2.3	0.44
44	GOTERM_BP_DIRECT	multicellular organism growth	organogenesis	RT		12	1.3	0.019	2.2	0.66
58	GOTERM_BP_DIRECT	hematopoietic progenitor cell differentiation	organogenesis	RT		9	1	0.073	2	0.94
62	GOTERM_BP_DIRECT	male gonad development	organogenesis	RT		10	1.1	0.061	2	0.92
26	GOTERM_BP_DIRECT	neurogenesis	organogenesis	RT		8	0.9	0.026	2.7	0.75
33	GOTERM_BP_DIRECT	angiogenesis	organogenesis	RT		27	2.9	3.2e-05	2.5	0.018
38	GOTERM_BP_DIRECT	negative regulation of angiogenesis	organogenesis	RT		8	0.9	0.047	2.4	0.88
42	GOTERM_BP_DIRECT	hemopoiesis	organogenesis	RT		9	1	0.041	2.3	0.86
54	GOTERM_BP_DIRECT	axonogenesis	organogenesis	RT		10	1.1	0.051	2.1	0.89
2	GOTERM_BP_DIRECT	positive regulation of Wnt signaling pathway	Signaling	RT		8	0.9	0.0011	4.8	0.18
11	GOTERM_BP_DIRECT	canonical Wnt signaling pathway	Signaling	RT		13	1.4	0.0006	3.3	0.13
13	GOTERM_BP_DIRECT	regulation of Rho protein signal transduction	Signaling	RT		11	1.2	0.0022	3.2	0.22
15	GOTERM_BP_DIRECT	negative regulation of Wnt signaling pathway	Signaling	RT		8	0.9	0.012	3.2	0.56
21	GOTERM_BP_DIRECT	transforming growth factor beta receptor signaling pathway	Signaling	RT		10	1.1	0.0067	2.9	0.41
22	GOTERM_BP_DIRECT	positive regulation of protein binding	Signaling	RT		9	1	0.012	2.9	0.56
31	GOTERM_BP_DIRECT	positive regulation of canonical Wnt signaling pathway	Signaling	RT		8	0.9	0.034	2.6	0.83
32	GOTERM_BP_DIRECT	peptidyl-serine phosphorylation	Signaling	RT		15	1.6	0.0026	2.5	0.24
34	GOTERM_BP_DIRECT	positive regulation of JNK cascade	Signaling	RT		8	0.9	0.042	2.5	0.87
37	GOTERM_BP_DIRECT	positive regulation of peptidyl-serine phosphorylation	Signaling	RT		8	0.9	0.047	2.4	0.88
46	GOTERM_BP_DIRECT	positive regulation of protein phosphorylation	Signaling	RT		18	1.9	0.0038	2.2	0.29
49	GOTERM_BP_DIRECT	negative regulation of canonical Wnt signaling pathway	Signaling	RT		10	1.1	0.044	2.1	0.87
52	GOTERM_BP_DIRECT	negative regulation of protein phosphorylation	Signaling	RT		8	0.9	0.086	2.1	0.96
57	GOTERM_BP_DIRECT	dephosphorylation	Signaling	RT		10	1.1	0.053	2.1	0.9
63	GOTERM_BP_DIRECT	transmembrane receptor protein tyrosine kinase signaling pathway	Signaling	RT		9	1	0.08	2	0.96
3	GOTERM_BP_DIRECT	substrate adhesion-dependent cell spreading	adhesion cell migration	RT		8	0.9	0.0018	4.5	0.19
17	GOTERM_BP_DIRECT	cell-matrix adhesion	adhesion cell migration	RT		11	1.2	0.0027	3.1	0.24
24	GOTERM_BP_DIRECT	positive regulation of cell migration	adhesion cell migration	RT		26	2.8	6.5e-06	2.8	0.0054
45	GOTERM_BP_DIRECT	cell migration	adhesion cell migration	RT		19	2	0.0025	2.2	0.24
47	GOTERM_BP_DIRECT	actin cytoskeleton organization	adhesion cell migration	RT		14	1.5	0.013	2.2	0.56
48	GOTERM_BP_DIRECT	extracellular matrix organization	adhesion cell migration	RT		11	1.2	0.032	2.2	0.81
50	GOTERM_BP_DIRECT	cytoskeleton organization	adhesion cell migration	RT		10	1.1	0.046	2.1	0.88
53	GOTERM_BP_DIRECT	negative regulation of cell migration	adhesion cell migration	RT		10	1.1	0.051	2.1	0.89
59	GOTERM_BP_DIRECT	single organismal cell-cell adhesion	adhesion cell migration	RT		10	1.1	0.056	2	0.91
8	GOTERM_BP_DIRECT	positive regulation of epithelial cell proliferation	proliferation	RT		12	1.3	0.00054	3.5	0.13
18	GOTERM_BP_DIRECT	positive regulation of fibroblast proliferation	proliferation	RT		9	1	0.0083	3.1	0.46
36	GOTERM_BP_DIRECT	negative regulation of epithelial cell proliferation	proliferation	RT		8	0.9	0.045	2.4	0.88
60	GOTERM_BP_DIRECT	cell cycle arrest	proliferation	RT		8	0.9	0.099	2	0.98
61	GOTERM_BP_DIRECT	negative regulation of cell proliferation	proliferation	RT		35	3.8	0.00015	2	0.056
9	GOTERM_BP_DIRECT	cell fate commitment	cell commitment and patterning	RT		11	1.2	0.0013	3.4	0.18
19	GOTERM_BP_DIRECT	pattern specification process	cell commitment and patterning	RT		8	0.9	0.015	3.1	0.59
43	GOTERM_BP_DIRECT	calcium ion transmembrane transport	calcium regulation	RT		9	1	0.046	2.3	0.88
56	GOTERM_BP_DIRECT	positive regulation of cytosolic calcium ion concentration	calcium regulation	RT		14	1.5	0.018	2.1	0.66
12	GOTERM_BP_DIRECT	myelination	other	RT		9	1	0.0062	3.2	0.39
51	GOTERM_BP_DIRECT	response to virus	other	RT		8	0.9	0.086	2.1	0.96
55	GOTERM_BP_DIRECT	regulation of membrane potential	other	RT		9	1	0.069	2.1	0.94
64	GOTERM_BP_DIRECT	protein stabilization	other	RT		12	1.3	0.038	2	0.85
			calcium ion transmembrane transport
		OFFICIAL_GENE_SYMBOL	GENE NAME
		Atp2b4	ATPase, Ca++ transporting, plasma membrane 4(Atp2b4)
		Asph	aspartate-beta-hydroxylase(Asph)
		Cacna1a	calcium channel, voltage-dependent, P/Q type, alpha 1A subunit(Cacna1a)
		Cacnb3	calcium channel, voltage-dependent, beta 3 subunit(Cacnb3)
		Itpr2	inositol 1,4,5-triphosphate receptor 2(Itpr2)
		Itgav	integrin alpha V(Itgav)
		Pkd2	polycystic kidney disease 2(Pkd2)
		Nalcn	sodium leak channel, non-selective(Nalcn)
		Trpv4	transient receptor potential cation channel, subfamily V, member 4(Trpv4)
			positive regulation of cytosolic calcium ion concentration
		OFFICIAL_GENE_SYMBOL	GENE NAME
		Jak3	Janus kinase 3(Jak3)
		Calcr	calcitonin receptor(Calcr)
		Cacna1a	calcium channel, voltage-dependent, P/Q type, alpha 1A subunit(Cacna1a)
		Fzd2	frizzled class receptor 2(Fzd2)
		Itgav	integrin alpha V(Itgav)
		Kdr	kinase insert domain protein receptor(Kdr)
		Kng1	kininogen 1(Kng1)
		Kng2	kininogen 2(Kng2)
		Nptn	neuroplastin(Nptn)
		Pth1r	parathyroid hormone 1 receptor(Pth1r)
		Pla2g6	phospholipase A2, group VI(Pla2g6)
		Pdgfra	platelet derived growth factor receptor, alpha polypeptide(Pdgfra)
		Pkd2	polycystic kidney disease 2(Pkd2)
		Trpv4	transient receptor potential cation channel, subfamily V, member 4(Trpv4)
